1 **Genome-wide screen of genomic imprinting in endosperm and**  
2 **population-level analysis reveal allelic variation for imprinting in flax**

3 Haixia Jiang<sup>1, #</sup>, Dongliang Guo<sup>1, #</sup>, Jiali Ye<sup>2</sup>, Yanfang Gao<sup>1</sup>, Huiqing Liu<sup>1</sup>, Yue  
4 Wang<sup>1</sup>, Min Xue<sup>1</sup>, Qingcheng Yan<sup>1</sup>, Jiayun Chen<sup>1</sup>, Lepeng Duan<sup>1</sup>, Gongzhe Li<sup>1</sup>, Xiao  
5 Li<sup>1</sup> and Liqiong Xie<sup>1, \*</sup>

6 <sup>1</sup>National Center of Melon Engineering and Technology, Molecular Breeding  
7 Laboratory, College of Life Science and Technology, Xinjiang University, Urumqi,  
8 Xinjiang, China.

9 <sup>2</sup>State Key Laboratory of Soil Erosion and Dryland Farming on the Loess Plateau,  
10 Institute of Soil and Water Conservation, College of Life Sciences, Northwest A&F  
11 University, Yangling, Shaanxi, China.

12 <sup>#</sup>These authors have contributed equally to this work.

13 <sup>\*</sup>**Correspondence:** Liqiong Xie, [picea@sina.com](mailto:picea@sina.com).

14 **Abstract**

15 Genomic imprinting is an epigenetic phenomenon caused by the biased expression of  
16 maternally and paternally inherited alleles. In flowering plants, genomic imprinting  
17 predominantly occurs in triploid endosperm and plays a vital role in seed development.  
18 In this study, we identified 241 candidate imprinted genes including 143 maternally  
19 expressed imprinted genes (MEGs) and 98 paternally expressed imprinted genes  
20 (PEGs) in flax (*Linum usitatissimum* L.) endosperm using deep RNA sequencing. The  
21 conservation of imprinting in plants is very limited and imprinting clustering is not a  
22 general feature. MEGs tends to be endosperm expression specific, while PEGs are  
23 non-tissue specific. Imprinted SNPs differentiated 200 flax cultivars into oil flax,  
24 oil-fiber dual purpose flax (OF) and fiber flax subgroups, suggesting that genomic  
25 imprinting contributes to intraspecific variation in flax. The nucleotide diversity ( $\pi$ ) of  
26 imprinted genes in oil flax subgroup is significantly higher than that in fiber flax  
27 subgroup, indicating that some imprinted genes undergo positive selection during flax  
28 domestication from oil flax to fiber flax. Imprinted genes undergo positive selection is  
29 related to the functions. Eleven imprinted genes related to seed size and weight were  
30 identified using the candidate gene-based association study. Our study provides  
31 information for further exploring the function and genomic variation of imprinted  
32 genes in flax population.

33 **Keywords:** genomic imprinting, flax endosperm, intraspecific variation, seed size,  
34 positive selection

35 **Introduction**

36 Genomic imprinting is an epigenetic phenomenon occurring in both mammals and  
37 flowering plants (Hutter *et al.*, 2010; Waters *et al.*, 2013). Imprinting occurs in the

38 placenta and embryo as well as in adult tissues in mammals (Renfree *et al.*, 2012),  
39 while in flowering plants, imprinting predominantly occurs in endosperm, and rarely  
40 in embryo and seed coat (Yuan *et al.*, 2017; Meng *et al.*, 2018). The diploid embryo  
41 transmits genetic information to the next generation, while the triploid endosperm,  
42 with 2:1 ratio of maternal to paternal genomes (2m:1p), provides nutrition and signals  
43 for embryo development (Sabelli and Larkins, 2009; Mei *et al.*, 2015). The deviation  
44 of the 2m:1p ratio in endosperm has adverse effect on seed development (Wang *et al.*,  
45 2018; Scott *et al.*, 1998; Lu *et al.*, 2012; Sekine *et al.*, 2013), implying the important  
46 role of imprinting in endosperm development. Imprinted genes were studied only in a  
47 limited plant species, including monocots of rice (*Oryza sativa*) (Yuan *et al.*, 2017;  
48 Luo *et al.*, 2011), maize (*Zea mays*) (Waters *et al.*, 2013; Meng *et al.*, 2018; Zhang  
49 *et al.*, 2011; Waters *et al.*, 2011; Dong *et al.*, 2017), sorghum (*Sorghum bicolor* L.  
50 Moench) (Zhang *et al.*, 2016a) and dicots of *Arabidopsis* (Gehring *et al.*, 2011; Wolff  
51 *et al.*, 2011; Hsieh *et al.*, 2011), castor bean (*Ricinus communis*) (Xu *et al.*, 2014). In  
52 most dicots, the endosperm is transient and consumed by the embryo at the later stage  
53 of seed development (Sreenivasulu and Wobus, 2013), while the endosperm of most  
54 monocots remains persistently and serves as a source of nutrition for seed germination  
55 (Luo *et al.*, 2011). There is no extensive conservation of imprinted genes across  
56 species (Waters *et al.*, 2011; Zhang *et al.*, 2016a; Dong, 2017), suggesting different  
57 species may require a unique set of imprinted genes for seed development.

58 In plants, imprinted genes were detected to be involved in the regulation of seed  
59 development, seed dormancy and postzygotic reproductive isolation (Sun *et al.*, 2017;  
60 Piskurewicz *et al.*, 2016; Kradolfer *et al.*, 2013; Wolff *et al.*, 2015). The loss of  
61 function of some imprinted genes leads to seed abortion (Joanis and Lloyd, 2002;  
62 Chaudhury *et al.*, 1997; Berger *et al.*, 2006). In *Arabidopsis*, the maternally expressed  
63 imprinted gene *MEA* encodes a Polycomb Repressive Complex 2 (PRC2) subunit in  
64 Polycomb group (PcG) complex. The seeds with maternal *MEA* allele developed  
65 normally, while those carrying maternal *mea* allele were aborted, regardless of the  
66 genotypes of paternal allele (Joanis and Lloyd, 2002). Imprinted genes influence seed  
67 size by regulating the development of embryo and endosperm (Yuan *et al.*, 2017;  
68 Scott *et al.*, 1998; Köhler *et al.*, 2005; Chen *et al.*, 2016). In rice, the loss-of-function  
69 mutants of *MEG2* and *MEG3* (MEGs) showed a significant reduction in seed size and  
70 weight, and the loss-of-function of *PEG1*, *PEG2*, *PEG3* (PEG) decreased starch  
71 content, seed size and yield (Yuan *et al.*, 2017). Regarding to another imprinted gene  
72 *OsFIE1* in rice, RNAi lines and homozygous T-DNA insertion mutant *osfiei* lines all  
73 showed delayed embryo development and reduction of seeds fertility, grain size, grain  
74 weight and aleurone layer cells (Huang *et al.*, 2016). Even a few imprinted genes  
75 were shown to be important in seed development, there are many more, of which the  
76 function is yet to be determined.

77 Some imprinted genes were shown to be under positive selection and intraspecific  
78 variation features (Hutter *et al.*, 2010; Berger *et al.*, 2012; Pignatta *et al.*, 2014). *MEA*

79 originated a block duplication 35 to 85 million years ago owing to a whole-genome  
80 duplication within the Brassicaceae lineage (Spillane *et al.*, 2007). After duplication,  
81 *MEA* underwent positive selection consistent with neo-functionalization and the  
82 parental conflict theory (Spillane *et al.*, 2007; Miyake *et al.*, 2009). In maize,  
83 conservative imprinting genes increased the substitution rate of nonsynonymous to  
84 synonymous (dN/dS) compared with non-conservative imprinting genes and more  
85 likely to undergo positive selection (Waters *et al.*, 2013). PEGs were more likely to be  
86 under positive selection and rapidly evolve than MEGs in *Arabidopsis thaliana*  
87 (Tuteja *et al.*, 2019). Imprinting showed evidence of intraspecific variation in  
88 *Arabidopsis* and maize (Waters *et al.*, 2013; Pignatta *et al.*, 2014). The existence of  
89 intraspecific variation of imprinting was associated with epigenetic variation (Pignatta  
90 *et al.*, 2014).

91 Flax (*Linum usitatissimum* L.) is an important economic crop due to its stem fiber  
92 and seed oil (Cloutier *et al.*, 2012; Guo *et al.*, 2020). Flax is a strict annual self  
93 pollination crop with a smaller genome size (~373 Mb) (Wang *et al.*, 2012), which  
94 are good for biological research. Cultivated flax were domesticated from a pale flax  
95 (*Linum bienne*) for oil usage at 10,000 years ago in the Near East and differentiated  
96 into fiber, OF and oil subgroups during the domestication of flax (Guo *et al.*, 2020;  
97 Allaby *et al.*, 2005; Fu and Allaby, 2010). Some genes underlying important traits  
98 including plant architecture, flowering, dehiscence, oil production and yield  
99 underwent strong artificial selection in the domestication process of flax (Guo *et al.*,  
100 2020; Zhang *et al.*, 2020). Whether imprinted genes are also undergone artificial  
101 selection during flax domestication has not been reported.

102 In this study, we have performed RNA-seq analysis of flax endosperm isolated  
103 from the reciprocal crosses between Cili2719 and Z11637. Based on the  
104 parent-of-origin biased expression of the parental alleles in the endosperm from both  
105 crosses, we identified 241 moderately imprinted genes including 143 MEGs and 98  
106 PEGs, 67 strongly imprinted genes including 63 MEGs and 4 PEGs and 19  
107 completely MEGs. The analysis of imprinted genes at population level demonstrated  
108 that imprinted genes divided the 200 flax germplasms into oil flax, OF and fiber flax  
109 subgroups, which suggested that imprinting promoted intraspecific variation of flax.  
110 The nucleotide diversity analysis showed that some imprinted genes were shown to be  
111 under positive selection consistent with function. Furthermore, we identified 11  
112 imprinted genes associated to seed size and weight. Our results will provide a  
113 theoretical basis for further study of gene imprinting and provide some insights for  
114 understanding the diversity of imprinted genes.

## 115 **Results**

### 116 **Identification of imprinted genes in flax endosperm**

117 To understand the parental origin of gene expression in flax, we performed RNA-seq  
118 analysis in endosperm isolated from the F<sub>1</sub> generation of Cili2719×Z11637 (CZ) and

119 Z11637×Cili2719 (ZC) at 7 days after pollination (DAP). Average 7.21 Gb of 125bp  
120 paired-end clean reads were obtained from each biological replicate with the Illumina  
121 novaseq6000 platform. The clean reads from CZ and ZC were aligned to parental  
122 genomes Cili2719 and Z11637 (Guo *et al.*, 2020) to identify the reads specifically  
123 originated from one of parents at each SNP site for allelic expression (Figure S1). In  
124 total, 52,794 SNPs in both reciprocal crosses with at least ten reads could be assigned  
125 to a parental allele and were used for allele-specific expression analysis in hybrid  
126 endosperm. About 37,000 SNP loci showed statistically significant deviation ( $p < 0.05$ ,  
127  $\chi^2$  test) from the expected 2m:1p ratio in both CZ and ZC endosperm.

128 Three different thresholds were used to identify genes showing parent-of-origin  
129 biased expression at three different levels (see “Materials and methods”). Among  
130 these SNP loci, 498 loci were considered as moderately imprinted loci, including 319  
131 maternally expressed imprinted SNP loci (ME-SNPs) corresponding to 143 MEGs  
132 and 179 paternally expressed imprinted SNP loci (PE-SNPs) corresponding to 98  
133 PEGs. And 141 loci were identified as strongly imprinted loci, including 135  
134 ME-SNPs and 6 PE-SNPs which correspond to 63 MEGs and 4 PEGs, respectively.  
135 In addition, 36 loci were identified as completely imprinted loci and all of them were  
136 ME-SNPs corresponding to 19 MEGs (Figure 1, Table S1). Among 241 imprinted  
137 genes, 229 genes were protein-coding genes (Table S2).

### 138 **Validation of imprinted genes**

139 For experimental confirmation, thirteen genes including five MEGs, five PEGs, and  
140 three non-imprinted genes, which represented the whole transcripts by RNA  
141 sequencing in this study, were randomly selected to validate the gene expression level  
142 of the high throughput sequencing with qRT-PCR analysis. The analysis showed that  
143 the gene expression level of the selected genes by qRT-PCR analysis was consistent  
144 with the RNA-seq data (Figure S2).

145 For further verification of the imprinting status, nine MEGs and three PEGs were  
146 used to perform RT-PCR on the hybrid endosperm and parents endosperm followed  
147 by Sanger sequencing (Figure S3). A 400-800bp fragment of each gene with at least  
148 one imprinted SNP site was selected for PCR amplification. The results showed that  
149 nine MEGs were predominantly expressed from the maternal alleles and three PEGs  
150 were preferentially expressed from the paternal alleles in reciprocal crosses, which  
151 were consistent with the RNA-seq data.

### 152 **Characterization analysis of imprinted genes identified in flax**

153 We carried out gene ontology (GO) analysis for the 229 imprinted protein-coding  
154 genes of flax, including 135 MEGs and 94 PEGs (Table S2). The background genes  
155 for GO analysis were 12,395 endosperm-expressed genes with at least ten reads could  
156 be assigned to a specific allele in both CZ and ZC. Categories with a significant level  
157 ( $P < 0.05$ ) were defined as enriched. Compared with the whole transcripts in

158 endosperm, imprinted genes were significantly enriched in catalytic activity or  
159 transferase activity according to their molecular function and metabolic process  
160 according to their biological processes (Figure S4A, Table S3).

161 To evaluate the interspecific conservation of imprinted genes, we compared  
162 imprinted genes identified in this study with the imprinted genes reported in  
163 *Arabidopsis* (Gehring *et al.*, 2011), rice (Yuan *et al.*, 2017; Luo *et al.*, 2011), maize  
164 (Waters *et al.*, 2013; Dong, 2017), sorghum (Zhang *et al.*, 2016a), and castor bean  
165 (Xu *et al.*, 2014). The analysis showed that there were 115, 89 and 59 genes found to  
166 be homologous in at least one of the five species at different confidence levels  
167 ( $<1E-10$ ,  $<1E-20$  and  $<1E-50$ , respectively) (Figure 2, Table S4-S5). At  
168  $E\text{-value}<1E-10$ , there were 32, 26, 43, 52, 39 flax imprinted genes conserved in  
169 *Arabidopsis*, castor bean, rice, sorghum and maize, respectively (Figure 2A, Table  
170 S4-S5). And 19, 21, 35, 46, 27 imprinted genes conserved with these plants at  
171  $E\text{-value}<1E-20$ , respectively (Figure 2B, Table S4-S5). In addition, less imprinted  
172 genes 13, 11, 21, 22 and 15 conserved with the five species at  $E\text{-value}<1E-50$ ,  
173 respectively (Figure 2C, Table S4-S5). Some imprinted genes had imprinted  
174 homologs in up to four species, while no imprinted gene in flax was conserved in all  
175 species (Figure 2, Table S4-S5). These results suggested that the conservation of  
176 imprinting in plants was quite limited.

177 Intriguingly, the expression of some conserved flax imprinted genes showed  
178 different parental origin in other species. For example, the flax gene *Lus10022747*  
179 encoding a serine/threonine-protein kinase WNK5 and its homologues in *Arabidopsis*,  
180 castor bean and rice showed maternally preferential expression, while its maize  
181 homolog displayed preferentially paternal expression (Table S4). A PAS domain  
182 tyrosine kinase family protein-coding gene *Lus10040540* and its homolog of maize  
183 were PEGs, but its homologues in castor bean, rice and sorghum were MEGs (Table  
184 S4). Among 115 conserved flax imprinted genes, only 59% (58 MEGs and 10 PEGs)  
185 remain the same preference of parental expression with other species (Table S4).

186 GO enrichment analysis of 115 conserved imprinted genes in flax displayed that  
187 MEGs significantly enriched in catalytic activity and metabolic process according to  
188 their molecular function and biological processes, respectively. PEGs enriched in  
189 compound binding according to their molecular function (Figure S4B, Table S6).

## 190 **Clustering of the flax imprinted genes**

191 To study the genomic distribution of flax imprinted genes, 229 imprinted genes were  
192 mapped to fifteen chromosomes for cluster analysis. The 229 imprinted genes were  
193 scattered distribution across fifteen chromosomes. By analyzing the genomic distance  
194 between the imprinted genes, we found that most of them were not co-localized in a  
195 cluster, and only 24 were fall into 12 clusters, where two imprinted genes of each  
196 cluster were within 10 kb (Figure 3, Table S7). The finding was similar to the results  
197 of *Arabidopsis* (Gehring *et al.*, 2011; Wolff *et al.*, 2011), maize (Waters *et al.*, 2011),

198 rice (Luo *et al.*, 2011), castor bean (Xu *et al.*, 2014) and sorghum (Zhang *et al.*,  
199 2016a), showing that clustering of imprinted gene is not a common phenomenon in  
200 plants.

### 201 **Endosperm-specific expression of the flax imprinted genes**

202 We analyzed the expression specificity of the imprinted genes in various tissues. The  
203 majority of MEGs (60%) preferentially expressed in endosperm, and only a minority  
204 (25.5%) of PEGs were preferentially expressing in endosperm (Figure 4A-B). The  
205 expression level of endosperm-preferred MEGs (endo-MEGs) and PEGs (endo-PEGs)  
206 were significantly ( $P < 0.05$ ) higher than that of all genes, whereas there was no  
207 evidence that endo-MEGs or endo-PEGs exhibited unusually high or low expression  
208 levels than other MEGs or PEGs which also expressed in other tissues (Figure 4C-D).  
209 We also analyzed the tissue specificity of 115 (75 MEGs and 40 PEGs) conserved  
210 imprinted genes and 38 (36 MEGs and 2 PEGs) conserved strong imprinted genes.  
211 Among 115 conserved imprinted genes, 49 (65.3%) MEGs and 12 (30%) PEGs  
212 showed endosperm-preferred expression (Figure S5A-B), and among the 38  
213 conserved strong imprinted genes, 29 MEGs (80.6%) and all PEGs were  
214 preferentially expressed in endosperm (Figure S5C), respectively. These results  
215 suggested that MEGs and the conserved imprinted genes are more likely to be  
216 preferentially expressed in endosperm.

### 217 **Flax imprinted genes can differentiate flax subgroups**

218 To investigate whether the variation in imprinted genes reflects genetic diversity  
219 among 200 natural flax varieties, we detected individual kinship of imprinted SNPs  
220 (498) or genome-wide SNPs (674,074) (Guo *et al.*, 2020). The kinships between  
221 imprinted SNPs or genome-wide SNPs were significantly correlated ( $R^2=0.8457$ )  
222 (Figure 5A). Phylogenetic tree constructed based on all imprinted SNPs, ME-SNPs or  
223 PE-SNPs separated 200 accessions into three different subgroups which correspond to  
224 oil flax, OF and fiber flax subgroups (Figure 5B, Figure S6). The flax population  
225 could also be separated into three subgroups by principle component analysis (PCA)  
226 (Figure 5C). These results indicated that the allele frequency of imprinted SNPs was  
227 significantly different among subgroups, suggesting that imprinted genes may be  
228 selected differently in subgroups and contribute to domestication.

### 229 **Selective sweep signals in imprinted genes**

230 To test the hypothesis that the diversity of imprinted genes are different in flax  
231 population, we collated all SNPs (3,191 SNPs) of 241 imprinted genes and compared  
232 the nucleotide diversity between oil flax (78 germplasms) and fiber flax subgroups  
233 (51 germplasms) which represented two primary morphotypes of cultivated flax  
234 (Zhang *et al.*, 2020). The  $\pi$  values of all imprinted genes, MEGs or PEGs decreased  
235 significantly in fiber flax compared with oil flax ( $P < 0.0001$ , *t* test) (Figure 6A-C).  
236 We focused on two imprinted genes, *Lus10010350* (PEG) and *Lus10024230* (MEG),

237 which contained more SNPs (31 SNPs and 43 SNPs, respectively) in genomic  
238 sequences. The allele frequency distribution of imprinted SNPs in *Lus10010350* was  
239 significantly different in the two subgroups, and the alternate allele ‘G’ (position  
240 333406) was primarily found in the oil subgroup and rarely in fiber subgroup (Figure  
241 6D). Significant reduction of  $\pi$  was also observed at the *Lus10010350* locus in fiber  
242 subgroup compared with that of oil subgroup and 90.32% of the SNPs were identified  
243 with a signature of purifying selection (Figure 6E-F). Similarly, the allele frequency  
244 distribution of *Lus10024230* was obvious different between the two subgroups and  
245 the alternate allele ‘A’ (position 492363) accounted for 61.67% in oil subgroup but  
246 only 6.98% in fiber subgroup (Figure 6G). Compared with oil subgroup, the  $\pi$  value  
247 of the SNPs in *Lus10024230* was dramatically decreased in fiber subgroup, and  
248 95.35% of the SNPs were identified with a signature of purifying selection (Figure  
249 6H-I). Taken together, these findings suggested that some imprinted genes may have  
250 been subjected to artificial selection during flax domestication.

### 251 **Candidate gene-based association study for seed size using flax imprinted genes**

252 Imprinted genes played an important role in the regulation of endosperm development  
253 and seed size (Yuan *et al.*, 2017; Luo *et al.*, 2000; Guitton *et al.*, 2004; Huang *et al.*,  
254 2017; Kinoshita *et al.*, 1999; Kiyosue *et al.*, 1999). To investigate whether imprinting  
255 is associated with seed size in flax, imprinted genes were used to perform candidate  
256 gene-based association study of seed size-related traits including seed length (SL),  
257 seed width (SW) and 1,000-seed weight (1000-SW). Using the general linear model  
258 (GLM) and mixed linear model (MLM) in TASSEL 5.0 (Bradbury *et al.*, 2007), 33  
259 imprinted genes containing 63 associated loci (SNPs) were detected to be associated  
260 with seed size and weight. Among them, 11 imprinted genes were repeatedly detected  
261 at least two environments or traits (Figure 7A-B, Table S8).

262 One of the significant signal peaks on chromosome 15 contained 9 repetitive SNPs  
263 (Figure 7C, Table S8), which located in the *Lus10010350* (PEG), encoding a  
264 bifunctional arginine demethylase and lysine hydroxylase *jmjd6* protein. This gene  
265 contained 31 SNPs, of which 12 induced nonsynonymous mutations and formed 11  
266 haplotypes (Figure 7D-E). We classified 200 accessions into two groups including  
267 haplotype A (reference alleles) and haplotypes B–K (alternate alleles) based on gene  
268 structural variation (Figure 7F). We found that flax accessions in haplotypes B–K had  
269 significantly longer seed length and width, and larger 1,000-seed weight than those in  
270 haplotype A (Figure 7G-J, Figure S7). These results suggested that the PEG  
271 *Lus10010350* may be involved in the seed size regulation in flax.

## 272 **Discussion**

### 273 **Characterization of imprinted genes in flax endosperm**

274 GO analysis for the 229 imprinted protein-coding genes of flax revealed that a  
275 majority of imprinted genes were significantly enriched in catalytic activity and

276 metabolic process (Figure S4A, Table S3), similar to the results in castor bean (Xu *et*  
277 *al.*, 2014) and sorghum (Zhang *et al.*, 2016a), suggesting imprinted genes affected  
278 various aspects of endosperm development. However, imprinted genes have limited  
279 conservation across plant species, in contrast to those in mammals (Waters *et al.*,  
280 2011; Zhang *et al.*, 2016a; Xu *et al.*, 2014; Dong, 2017; Zhang *et al.*, 2003). In maize  
281 and sorghum endosperm, only about 10% and 33% imprinted genes were conserved  
282 with other species, respectively (Waters *et al.*, 2011; Zhang *et al.*, 2016a). Among 165  
283 imprinted genes in rice, only 33% of them were conserved in maize (Dong, 2017).  
284 Twenty-five (12%) imprinted genes identified in castor bean were conserved in  
285 *Arabidopsis*, rice or maize (Xu *et al.*, 2014). In this study, the conservation of flax  
286 imprinted genes was evaluated with those in other species (*Arabidopsis*, castor bean,  
287 rice, sorghum and maize) at three levels of stringency. There were 115 (50.2%), 89  
288 (38.9%), 59 (25.8%) imprinted genes in flax which were homologous to those in at  
289 least one of the five species at E-value<1E-10, 1E-20 and 1E-50, respectively (Figure  
290 2, Table S4-S5) while none imprinted genes of flax were found having imprinted  
291 homologs with all five species (Figure 2, Table S4-S5). Those results suggested that  
292 some common pathways in different flowering plants may need to be regulated by  
293 imprinting to modulate endosperm development but different genes in the pathway  
294 are selected to be imprinted in different species. This explains why the conservation  
295 of imprinting in plants is quite limited.

296 An interesting observation was that among 115 conserved imprinted genes, only 68  
297 genes (58 MEGs and 10 PEGs) showed the same origin of parental expression as in  
298 other species (Table S4). The remaining 47 genes (17 MEGs and 30 PEGs) had  
299 opposite origin of parental expression. For instance, the gene *Lus10041031* is a  
300 complete MEG identified in our study, but its maize homolog is a PEG (Waters *et al.*,  
301 2013). *Lus10021926* is a strong PEG in flax, while in *Arabidopsis* and castor bean its  
302 homologies are MEGs (Gehring *et al.*, 2011; Xu *et al.*, 2014). The homologous genes  
303 of the strong PEG *Lus10016563* are PEG in maize and MEGs in rice and sorghum  
304 (Waters *et al.*, 2013; Yuan *et al.*, 2017; Zhang *et al.*, 2016a). This suggested that those  
305 genes have opposite mode of parental expression in different species may be subject  
306 to gene dosage, a mechanism thought to be important for endosperm development  
307 (Wang *et al.*, 2018; Scott *et al.*, 1998; Lu *et al.*, 2012; Sekine *et al.*, 2013). It was  
308 noteworthy to note that the gene *Lus10041386* encoding a histone-lysine  
309 N-methyltransferase Enhancer of Zeste homolog 2 (EZH2) is homologous to the  
310 FERTILIZATION-INDEPENDENT SEED Polycomb Repressive Complex 2  
311 (FIS-PRC2) class gene *MEA* in *Arabidopsis* and the imprinted gene  
312 *GRMZM2G157820* (*EZH2*) in maize (Table S4). In rice and other species, other  
313 members of PRC2 genes are also imprinted, suggesting that imprinting of PRC2  
314 genes is a conserved mechanism in flowering plants. Several lines of evidence  
315 suggested that PRC2 repressed the replication of central-cell nuclear before  
316 fertilization likely by the maternally expressed alleles and regulated endosperm  
317 proliferation, suggesting a vital role in seed development (Chaudhury *et al.*, 1997;



318 Kiyosue *et al.*, 1999; Zhang *et al.*, 2005; Ohad *et al.*, 1996; Ohad *et al.*, 1999; Luo *et al.*,  
319 *et al.*, 1999; Moreno-Romero *et al.*, 2019).

### 320 **Imprinted genes are not extensively clustered**

321 Physical clustering of imprinted genes is a conserved feature in mammals (Gehring *et al.*  
322 *et al.*, 2011; Gregg *et al.*, 2010), while there is little evidence of clustering in plant  
323 species. Imprinted genes identified in maize (Waters *et al.*, 2011), *Arabidopsis*  
324 (Gehring *et al.*, 2011; Wolff *et al.*, 2011), rice (Luo *et al.*, 2011), castor bean (Xu *et al.*,  
325 *et al.*, 2014) and sorghum (Zhang *et al.*, 2016a) were not shown to be extensive  
326 clustered. Using a clustering criterion consistent with that in *Arabidopsis* (~125 Mb)  
327 and castor bean (~350 Mb) which have comparable genome size to flax (~373 Mb)  
328 (Gehring *et al.*, 2011; Xu *et al.*, 2014), we found that 24 of 229 flax imprinted genes  
329 were fall into 12 clusters (Figure 3, Table S7), similar to the proportion in *Arabidopsis*  
330 (Gehring *et al.*, 2011; Wolff *et al.*, 2011), rice (Luo *et al.*, 2011), maize (Waters *et al.*,  
331 2011), castor bean (Xu *et al.*, 2014) and sorghum (Zhang *et al.*, 2016a), suggesting  
332 that imprinting clustering may be not a general feature in plants. Whether the  
333 clustered imprinted genes are coordinately regulated as those genes in animal clusters  
334 remains to be investigated.

### 335 **Endosperm-specific expression of flax imprinted genes**

336 According to previous reports, imprinted genes in plants were mainly restricted to  
337 express in endosperm (Berger *et al.*, 2012). But more and more studies had shown  
338 that only some imprinted genes are preferentially expressed in endosperm, while  
339 others are also expressed in other tissues (Waters *et al.*, 2013; Waters *et al.*, 2011;  
340 Dong, 2017). The proportions of endo-MEGs and endo-PEGs were dramatically  
341 different (68% MEGs versus 26% PEGs, 51% MEGs versus 24% PEGs in maize;  
342 50% MEGs versus 16% PEGs in rice; 50% MEGs versus 20% PEGs in sorghum)  
343 (Waters *et al.*, 2013; Dong, 2017). In our study, we found 81 endo-MEGs (60%) and  
344 only 24 endo-PEGs (25.5%) in flax (Figure 4A-B), similar to the proportion in rice,  
345 sorghum and maize (Waters *et al.*, 2013; Zhang *et al.*, 2016a; Dong, 2017). The  
346 expression level of endo-MEGs and endo-PEGs was significantly higher than that of  
347 all genes (Figure 4C-D). Compared with all imprinted genes (60% endo-MEGs versus  
348 25.5% endo-PEGs), the proportion of endo-MEGs (65%) and endo-PEGs (30%) of  
349 conserved imprinted genes increased (Figure S5A-B). In the 38 (36 MEGs and 2  
350 PEGs) conserved strong imprinted genes, 29 MEGs (80.6%) and all PEGs were  
351 endosperm-preferred expression (Figure S5C). These findings suggested that MEGs  
352 tends to be endosperm preferentially expressed, while PEGs are inclined to non-tissue  
353 specific expression. It also implied that the conserved imprinted genes are more likely  
354 to be preferentially expressed in endosperm and play an important role in seed  
355 development.

### 356 **Candidate gene-based association study reveals that some imprinted genes are** 357 **involved in flax seed size regulation**

358 Previous studies have shown that imprinted genes play an important role in seed  
359 development by regulating the development of endosperm (Yuan *et al.*, 2017; Köhler  
360 *et al.*, 2005; Chen *et al.*, 2016; Luo *et al.*, 2000; Guitton *et al.*, 2004; Huang *et al.*,  
361 2017; Zhang *et al.*, 2016b). Eleven imprinted genes related to seed size and  
362 1,000-seed weight were obtained based on candidate gene-based association study.  
363 Among 11 imprinted genes, the gene *Lus10036044* (MEG) encoding a plant AT-rich  
364 sequence- and zinc-binding (PLATZ) transcription factor had significantly associated  
365 signal peaks on chromosome 1 (Table S8). PLATZ transcription factor is a novel class  
366 of plant-based zinc ion and DNA binding proteins, reported to regulate the seed size  
367 and weight (Azim *et al.*, 2020). *ZmPLATZ12* (*Fl3*) is a maternally expressed  
368 imprinted gene specifically expressing in the starchy cells of endosperm in maize. The  
369 semi dominant negative *fl3* mutant resulted in severe defects of endosperm and  
370 dramatically reduced the weight of seeds (Li *et al.*, 2017). In rice, the PLATZ  
371 transcription factor *GL6* positively controlled grain length through promoting cell  
372 proliferation in grains. The null *gl6* mutant led to short grains, whereas  
373 overexpression the *GL6* produced large grains (Wang *et al.*, 2019). Another PLATZ  
374 gene *SHORT GRAIN6* (*SG6*) determined grain size by regulating the cell division of  
375 spikelet hull. The grain size and weight was significantly enlarged in the *SG6*  
376 overexpression lines and reduced in *sg6* mutant lines in rice (Zhou and Xue, 2020).

377 Another candidate gene *Lus10037040* (MEG) located on chromosome 1, which  
378 belongs to the MADS-box genes (Table S8). MADS-box genes had important  
379 functions in the development of seed by epigenetic mechanism including DNA  
380 methylation and histone modifications (Zhang *et al.*, 2016b). In rice, *OsMADS87*  
381 (MEG) affected seed size by regulating endosperm cellularization during syncytial  
382 stage. Over expression the *OsMADS87* led to larger seeds, and *OsMADS87*-RNAi  
383 resulted in smaller seeds (Chen *et al.*, 2016). The MADS-box gene *PHE1* (PEG)  
384 regulated seed size in *Arabidopsis thaliana* via influencing the expression of *AGL62*  
385 which might affect the endosperm cellularization (Sun *et al.*, 2017). *OsMADS29*  
386 regulated seed development though regulating cell degeneration of maternal tissues.  
387 *OsMADS29*-RNAi resulted in aborted and/or shriveled seeds with deficient starch  
388 accumulation in endosperm (Yang *et al.*, 2012). Heterologous expression the  
389 *CnMADS* gene significantly increased the seed size of *Arabidopsis* (Sun, 2018).

390 *Lus10024230* annotated as flavonol synthase (FLS) is also potentially involved in  
391 seed size control (Table S8). In the lines of *FLS*-RNAi of tobacco, the pods and seed  
392 development was arrested and the height, pods size, pods weight, seeds number were  
393 significantly reduced (Mahajan *et al.*, 2011). Furthermore, the alternative alleles at  
394 *Lus10010350* (haplotypes B–K) had significantly longer seed length and width, and  
395 larger 1,000-seed weight than those in reference allele (haplotype A) in 200 flax  
396 accessions (Figure 7G–J, Figure S7). Together, our study identified a few candidate  
397 imprinted gene which are potentially involved in seed development and modulate the

398 seed size. The genetic variation of these genes between flax lines may be harnessed as  
399 breeding tool for enhance seed yield.

#### 400 **Intraspecific variation of flax imprinted genes**

401 DNA methylation, histone modification and non-coding small RNAs caused  
402 genomic imprinting (Zhang *et al.*, 2016a; Sha, 2008; Hanna and Kelsey, 2017).  
403 Epigenetic modification often varied across different individuals of the same species  
404 (Pignatta *et al.*, 2014; Xu *et al.*, 2019). In maize, differentially methylated regions  
405 (DMRs) were changed in different subgroups and genotypes (Xu *et al.*, 2019; Li *et al.*,  
406 2015). In *Arabidopsis*, DNA methylation and small RNAs differentiated in natural  
407 populations and contributed to phenotypic diversity (Pignatta *et al.*, 2014; Schmitz *et al.*  
408 *et al.*, 2011; Becker *et al.*, 2011; Graaf *et al.*, 2015; Schmitz *et al.*, 2013). Genomic  
409 imprinting, as the functional product of epigenetic modification, varied within a same  
410 species and the intraspecific variation of imprinted genes was associated with  
411 epigenetic variation (Waters *et al.*, 2013; Pignatta *et al.*, 2014). In this research, the  
412 analysis of phylogenetic tree and PCA for imprinted SNPs showed that imprinted  
413 SNPs effectively divided the 200 flax germplasms into oil, OF and fiber flax  
414 subgroups (Figure 5, Figure S6), suggesting that genomic imprinting changed in  
415 different subgroups and contributed to phenotypic diversity in flax.

#### 416 **Some imprinted genes show evidence of positive selection**

417 According to previous reports, some imprinted genes showed positive selection  
418 features (Hutter *et al.*, 2010; Berger *et al.*, 2012). *MEA* as a component of FIS-PRC2  
419 was a very important conserved imprinted gene in seed development underwent  
420 positive selection in the out-crossing lineages but not in the self-fertilizing species of  
421 *Arabidopsis* (Spillane *et al.*, 2007; Miyake *et al.*, 2009). Conserved imprinted genes  
422 displayed higher dN/dS rates than non-conservative imprinted genes between maize,  
423 rice and sorghum, suggesting conserved imprinted genes showing greater evidence of  
424 positive selection (Waters *et al.*, 2013). Compared with MEGs, PEGs exhibited  
425 elevated dN/dS values and more likely to under positive darwinian selection in  
426 *Arabidopsis thaliana* (Tuteja *et al.*, 2019). Our data showed that the nucleotide  
427 diversity of imprinted genes in oil flax subgroup was significantly higher than that in  
428 fiber flax subgroup (Figure 6A-C). The  $\pi$  values of some imprinted genes, such as  
429 *Lus10010350* (PEG, Figure 6D-F), *Lus10024230* (MEG, Figure 6G-I) and  
430 *Lus10041386* (MEG, Figure S8) were also significant difference between oil and fiber  
431 flax subgroup. Our results revealed that imprinted genes have been undergone  
432 artificial selection in the process of flax domestication from oil flax to fiber flax (Guo  
433 *et al.*, 2020).

434 By analyzing the nucleotide diversity of imprinted genes in different flax subgroups,  
435 we found that the  $\pi$  values of imprinted genes in oil flax subgroup were significantly  
436 higher than those in fiber flax subgroup no matter what parental origin they were  
437 (Figure 6A-C). Meanwhile, we also discovered that the imprinted genes related to

438 seed size and weight contained MEGs and PEGs (Table S8). It seemed that MEGs  
439 and PEGs were same shaped by selective force in flax population differentiation  
440 although the number of MEGs was larger than that of PEGs. So, we expected that  
441 imprinted genes undergo positive selection is related to the functions, but not to the  
442 parental origin which was different from the previous report (Tuteja *et al.*, 2019).  
443 Compared with parental conflict theory, the imprinting under relaxed selection theory  
444 that genomic imprinting evolves consistent with neo-functionalization (Rodrigues and  
445 Zilberman, 2015) can better explain the intraspecific imprinting variation in flax  
446 subgroups.

## 447 **Materials and methods**

### 448 **Plant Material and Tissue collection**

449 The two parental lines of flax (*Linum usitatissimum* L.) for reciprocal crosses,  
450 Cili2719 (C) and Z11637 (Z), were grown at the Miquan Experiment filed in Urumqi,  
451 Xinjiang. The large seed line Cili2719 which 1000-seed weight was about 10.5g  
452 originated from France and the small seed line Z11637 that 1000-seed weight was  
453 about 3.7g originated from the United States. The seeds of Cili2719×Z11637 (CZ)  
454 and Z11637×Cili2719 (ZC) were collected at 7 DAP (day after pollination).  
455 Endosperm tissues were collected from at least 50 seeds by manual dissection in each  
456 replicate and were immediately frozen in liquid nitrogen. Three biological repeats  
457 were set up for each line. For phenotyping, the 200 accessions were planted in four  
458 environment comprising Dali in Yunnan Province in 2016 (2016DL), Urumqi in  
459 Xinjiang autonomous region in 2017 and 2019 (2017UR, 2019UR), and YiLi in  
460 Xinjiang autonomous region in 2019 (2019YL). Planting and phenotyping of the 200  
461 accessions were performed using a same strategy as described in our previous study  
462 (Guo *et al.*, 2020).

### 463 **Library construction for RNA-Seq**

464 Total RNA was extracted using a RNAPrep Pure Plant Kit (Tiangen Biotechnology of  
465 Beijing, <http://www.tiangen.com/>). The quantification and qualification of RNA was  
466 checked by 1% agarose gels, NanoPhotometer<sup>®</sup> spectrophotometer (IMPLEN, CA,  
467 USA), Qubit<sup>®</sup> RNA Assay Kit in Qubit<sup>®</sup> 2.0 Fluorometer (Life Technologies, CA,  
468 USA) and the RNA Nano 6000 Assay Kit of the Bioanalyzer 2100 system (Agilent  
469 Technologies, CA, USA). The RNA-seq libraries were generated using NEBNext<sup>®</sup>  
470 Ultra<sup>™</sup> RNA Library Prep Kit for Illumina<sup>®</sup> (NEB, USA) according to the  
471 manufacturer's instructions and the high-throughput sequencing was performed with  
472 the Illumina NovaSeq6000 platform. Then, the quality and quantity of these libraries  
473 were assessed by using the Agilent Bioanalyzer 2100 system and Q-PCR. A data size  
474 of 301.98 million 125bp paired-end raw reads was obtained from CZ and ZC.

### 475 **Read mapping and gene expression analysis**

476 After removing the reads containing adapter, reads containing ploy-N (> 10%) and  
477 low quality reads ( $Q_{\text{phred}} \leq 20$ ) from raw data, a total of 288.37 million clean reads  
478 (43.26 Gb) were obtained for the following analysis. The clean reads were aligned to  
479 flax reference genome  
480 ([https://phytozome.jgi.doe.gov/pz/portal.html#!info?alias=Org\\_Lusitatissimum](https://phytozome.jgi.doe.gov/pz/portal.html#!info?alias=Org_Lusitatissimum))  
481 (Wang *et al.*, 2012) using Hisat2 v2.0.4. HTSeq v0.9.1 to count the reads numbers  
482 mapped to each gene. And then the expected number of Fragments Per Kilo base of  
483 transcript sequence per Millions base pairs sequenced (FPKM) of each gene was  
484 calculated based on the length of the gene and reads count mapped to this gene  
485 (Trapnell *et al.*, 2010). In the three biological replicates, the gene with an average  
486 expression level of FPKM > 1 was identified as "expressed" (Meng *et al.*, 2018).

### 487 **Identification of imprinted genes**

488 The clean reads from CZ and ZC were aligned to parental genomes Clli2719 and  
489 Z11637 from our previous research (Guo *et al.*, 2020) to obtain the reads of C and Z  
490 alleles at each SNP site for parental allelic expression analysis. Theoretically, the  
491 allelic ratio of the maternal to paternal is 2 to 1 in hybrid endosperm. Based on the  
492 2m:1p ratio, SNP loci with more than 10 alleles reads in reciprocal crosses were used  
493 to perform a two-tailed chi square ( $\chi^2$ ) test. Moderately imprinted SNP loci had  
494 significant allelic bias ( $\chi^2 < 0.05$ ) and >80% of the transcripts from the maternal allele  
495 for maternally expressed imprinted SNP loci or >60% of the transcripts coming from  
496 the paternal allele for paternally expressed imprinted SNP loci in both reciprocal  
497 hybrids. Strong maternally or paternally expressed imprinted SNP loci were defined  
498 as having significant allelic bias ( $\chi^2 < 0.01$ ) and >90% of transcripts derived from the  
499 maternal allele or paternal allele, respectively. Complete maternally/paternally  
500 expressed imprinted SNP loci had >99% of the transcripts from the maternal/paternal  
501 allele (Waters *et al.*, 2013; Meng *et al.*, 2018). And the genes containing at least one  
502 imprinted SNP loci were identified as imprinted genes.

### 503 **Validation of imprinted gene and expression analysis**

504 Thirteen genes were used to perform Quantitative RT-PCR (qRT-PCR) analysis  
505 (Table S9) and twelve imprinted genes were detected using a PCR-sequencing  
506 method (Table S10) (Meng *et al.*, 2018; Xu *et al.*, 2014). The endosperm cDNA  
507 samples at 7-DAP were collected for RNA isolation with three biological repeats for  
508 each sample.

509 The extraction, quantification and identification of total RNA were the same as that  
510 of library construction for RNA-Seq. First-strand cDNA synthesis was performed  
511 using 5×All-In-One RT MasterMix (with AccuRT Genomic DNA Removal Kit)  
512 according to the manufacturer recommended protocol for qRT-PCR and RT-PCR  
513 (abm, Cat. No.G492, <http://www.abmGood.com/>). Each qRT-PCR reaction of CZ and  
514 ZC was performed by the manufacturer's instructions of EvaGreen Express 2×qPCR  
515 MasterMix (abm, Cat. No.MasterMix-ES, <http://www.abmGood.com/>) and

516 BioRad®CFX96 Real-Time PCR system (Bio-Rad). Relative expression was  
517 quantified with the geometric mean of internal reference genes *ETIFI* (eukaryotic  
518 translation initiationfactor 1), *GAPDH* (glyceraldehyde 3-phosphate dehydrogenase),  
519 and *ETIF5A* (eukaryotic translation initiationfactor 5A) (Hobson and Deyholos, 2013;  
520 Huis *et al.*, 2010). For RT-PCR, a 400-800bp amplification fragment of each gene  
521 was amplified by different primers with four endosperm cDNA samples: CC (inbred  
522 lines of Clli2719), ZZ (inbred lines of Z11637), CZ and ZC of 7-DAP endosperm.  
523 The RT-PCR amplified products contained at least one imprinted SNP sites were  
524 analyzed on agarose gels and then sequenced.

### 525 **Functional characterization of imprinted features**

526 Gene annotation of imprinted genes in flax endosperm was downloaded from the  
527 reference genome (<https://phytozome.jgi.doe.gov/pz/portal.html>), and GO enrichment  
528 analysis was carried out with WEGO (<http://wego.genomics.org.cn/>) (Xu *et al.*, 2014;  
529 Ye *et al.*, 2006).

530 The imprinted genes of flax were investigated for sequence homology in  
531 *Arabidopsis* (Gehring *et al.*, 2011), rice (Yuan *et al.*, 2017; Luo *et al.*, 2011), maize  
532 (Waters *et al.*, 2013; Dong, 2017), sorghum (Zhang *et al.*, 2016a), and castor bean (Xu  
533 *et al.*, 2014) using blast. The peptide sequences of flax imprinted genes were obtained  
534 from the flax database in Phytozome v12.1  
535 (<https://phytozome.jgi.doe.gov/pz/portal.html>). Then, the peptide sequences were  
536 aligned to the *Arabidopsis* genome (*Arabidopsis thaliana* TAIR10) and high-scoring  
537 (E-value<1E-10, 1E-20 and 1E-50) blasts hits were ordered by increasing E-value. If  
538 the *Arabidopsis* imprinted genes were identified amongst the blast hits, and the gene  
539 with the smallest E-value was recorded. Similarly, candidate genes from this study in  
540 flax were aligned to the rice (*Oryza sativa* v7\_JGI), maize (*Zea mays* Ensembl-18),  
541 sorghum (*Sorghum bicolor* v3.1.1) and castor bean genome (*Ricinus communis* v0.1).  
542 The Venn diagrams were drawn by the draw venn diagram online software  
543 (<http://bioinformatics.psb.ugent.be/webtools/Venn/>).

544 For clustering analysis of imprinted genes, a standard was applied that imprinted  
545 genes within 10 kb of one another in the flax genome was a candidate cluster  
546 (Gehring *et al.*, 2011; Xu *et al.*, 2014). Positions of imprinted genes on chromosome  
547 were mapped using the MapChart software (Voorrips, 2002).

### 548 **The tissue-specific expression analysis of imprinted genes in endosperm**

549 The gene-expression patterns for MEGs and PEGs in various flax tissues in reciprocal  
550 hybrids were identified based on RNA-seq analysis. The endosperm and embryo  
551 tissues were harvested at 7 DAP and the leaf tissues were collected at 2 weeks after  
552 planting. For each sample, three biological replicates were used. The FPKM  
553 expression values of all genes and imprinted genes in CZ and ZC were  
554 log-transformed. All genes with FPKM>1 in endosperm were used in this study. The  
555 heat map and hierarchical clustering of normalized expression levels (FPKM) were

556 performed with the MeV4.9.0 software (Multi Experiment Viewer,  
557 <https://sourceforge.net/projects/mev4/files/mev-tm4/>) (Guo *et al.*, 2020).

### 558 **Phylogenetic tree and population structure analysis using imprinted SNPs**

559 To test the relationship between SNP variation at population level and population  
560 structure, an individual-based neighbor-joining tree was generated based on the all  
561 imprinted SNPs (498 SNPs), ME-SNPs (319 ME-SNPs) or PE-SNPs (179 PE-SNPs)  
562 by TASSEL's Cladogram function (Bradbury *et al.*, 2007). We compared the kinship  
563 of 200 accessions calculated by imprinted SNPs (498) and genome-wide SNPs  
564 (674,074) obtained from our previous research (Guo *et al.*, 2020). Principal  
565 component analysis (PCA) was conducted based on the imprinted SNPs by using the  
566 software TASSEL 5.0 (Bradbury *et al.*, 2007).

### 567 **Identifying selection signatures of imprinted genes**

568 A set of 78 oil flax and 51 fiber flax accessions which represent two primary  
569 morphotypes of cultivated flax were used for selective sweeps analysis. To test the  
570 genetic diversity of imprinted genes in different subgroups, 3,191 SNPs were obtained  
571 by mapping the imprinted genes to our previously constructed variation map (Guo *et al.*  
572 *et al.*, 2020). The  $\pi$  values of all imprinted genes (241), MEGs (143) and PEGs (98)  
573 between oil and fiber subgroups were calculated at the gene level using all SNPs  
574 within each imprinted gene by the software DnaSP 5.1 (Librado and Rozas, 2009).  
575 Furthermore, the  $\pi$  values were also calculated at the SNP level in oil subgroup and  
576 fiber subgroup for detecting the selection signatures in a single imprinted gene using  
577 DnaSP 5.1 (Librado and Rozas, 2009).

### 578 **Candidate gene-based association study for seed size-related traits using flax 579 imprinted genes**

580 To analyze the association between imprinted genes and seed size-related traits,  
581 imprinted genes were used to perform candidate gene-based association study by the  
582 general linear model (GLM) and mixed linear model (MLM) in TASSEL 5.0  
583 (Bradbury *et al.*, 2007). The 3,191 SNPs in the imprinted genes and seed size-related  
584 traits including seed length (SL), seed width (SW) and 1,000-seed weight (1,000-SW)  
585 of 200 flax accessions were obtained from our previous research (Guo *et al.*, 2020).  
586 For GLM analysis, the top two principal components (PC) were used to generate the  
587 population structure matrix and the threshold was set as  $0.1/\text{total SNPs}$  ( $\log_{10}(P) =$   
588  $-4.50$ ). For MLM analysis, P matrix and Kinship (K) matrix need to be considered,  
589 and the suggestive threshold was set as  $1/\text{total SNPs}$  ( $\log_{10}(P) = -3.50$ ). The imprinted  
590 genes repeatedly detected for at least two environments or traits were considered to be  
591 associated with seed size and weight.

### 592 **Acknowledgements**

593 We thank Chinese Crop Germplasm Resources Information System (CGRIS), Plant  
594 Gene Resource Centre in Canada (PGRC) and United States National Plant  
595 Germplasm System (U.S.NPGS) for providing us with germplasm resources. This  
596 study was supported by the National Natural Science Foundation of China  
597 (32060426), Resource Platform Project of Xinjiang Uygur Autonomous Region of  
598 China (PT1808) and Science and Technology Innovation Project for Doctoral  
599 Students of Xinjiang University of China (XJUBSCX-2017017). We are grateful to  
600 professors Ming Luo and Donghe Xu for constructive comments to improve the  
601 manuscript. The authors declare no competing interests of this work.

## 602 **Conflicts of interest statement**

603 The authors declare no competing financial interests.

## 604 **Availability of data and materials**

605 Raw resequencing sequence data of the two parental lines Cili2719 and Z11637 of  
606 flax for reciprocal crosses are available at NCBI under accession PRJNA590636  
607 ([ncbi.nlm.nih.gov/bioproject/PRJNA590636](http://ncbi.nlm.nih.gov/bioproject/PRJNA590636)) (Guo *et al.*, 2020).

## 608 **References**

- 609 Allaby RG, Peterson GW, Merriwether DA, Fu Y-B (2005). Evidence of the  
610 domestication history of flax (*Linum usitatissimum* L.) from genetic diversity of the  
611 *sad2* locus. *Theoretical and Applied Genetics* **112**, 58-65.  
612 <https://doi.org/10.1007/s00122-005-0103-3>
- 613 Azim JB, Khan MFH, Hassan L, Robin AHK (2020). Genome-wide characterization  
614 and expression profiling of plant-specific PLATZ transcription factor family genes  
615 in *Brassica rapa* L. *Plant Breeding and Biotechnology* **8**, 28-45.
- 616 Becker C, Hagemann J, Müller J, Koenig D, Stegle O, Borgwardt K, Weigel D (2011).  
617 Spontaneous epigenetic variation in the *Arabidopsis thaliana* methylome. *Nature*  
618 **480**, 245–249. <https://doi.org/10.1038/nature10555>
- 619 Berger F, Grini PE, Schnittger A (2006). Endosperm: an integrator of seed growth and  
620 development. *Current Opinion in Plant Biology* **9**, 664–670.  
621 <https://doi.org/10.1016/j.pbi.2006.09.015>
- 622 Berger F, Vu TM, Li J, Chen B (2012). Hypothesis: selection of imprinted genes is  
623 driven by silencing deleterious gene activity in somatic tissues. *Cold Spring Harbor*  
624 *Symposia on Quantitative Biology* **77**, 23-29.  
625 <https://doi.org/10.1101/sqb.2012.77.014514>
- 626 Bradbury PJ, Zhang Z, Kroon DE, Casstevens TM, Ramdoss Y, Buckler ES (2007).  
627 TASSEL: software for association mapping of complex traits in diverse samples.  
628 *Bioinformatics* **23**, 2633–2635. <https://doi.org/10.1093/bioinformatics/btm308>
- 629 Chaudhury AM, Ming L, Miller C, Craig S, Dennis ES, Peacock WJ (1997).  
630 Fertilization-independent seed development in *Arabidopsis thaliana*. *PNAS* **94**,  
631 4223–4228. <https://doi.org/10.1073/pnas.94.8.4223>
- 632 Chen C, Begcy K, Liu K, Folsom JJ, Wang Z, Zhang C, Walia H (2016). Heat stress



- 633 yields a unique MADS box transcription factor in determining seed size and  
634 thermal sensitivity. *Plant Physiology* **171**, 606-622.  
635 <https://doi.org/10.1104/pp.15.01992>
- 636 Cloutier S, Ragupathy R, Miranda E, Radovanovic N, Reimer E, Walichnowski A,  
637 Ward K, Rowland G, Duguid S, Banik M (2012). Integrated consensus genetic and  
638 physical maps of flax (*Linum usitatissimum* L.). *Theoretical and Applied Genetics*  
639 **125**, 1783-1795. <https://doi.org/10.1007/s00122-012-1953-0>
- 640 Dong X 2017. The regulation of genetic imprinting in maize endosperm and its  
641 stability and conservation. China Agricultural University.
- 642 Dong X, Zhang M, Chen J, Peng L, Zhang N, Wang X, Lai J (2017). Dynamic and  
643 antagonistic allele-specific epigenetic modifications controlling the expression of  
644 imprinted genes in maize endosperm. *Molecular Plant* **10**, 442-455.  
645 <https://doi.org/10.1016/j.molp.2016.10.007>
- 646 Fu Y-B, Allaby RG (2010). Phylogenetic network of *Linum* species as revealed by  
647 non-coding chloroplast DNA sequences. *Genetic Resources and Crop Evolution* **57**,  
648 667-677. <https://doi.org/10.1007/s10722-009-9502-7>
- 649 Gehring M, Missirian V, Henikoff S (2011). Genomic analysis of parent-of-origin  
650 allelic expression in *Arabidopsis thaliana* seeds. *Plos One* **6**, e23687.  
651 <https://doi.org/10.1371/journal.pone.0023687>
- 652 Graaf Avd, Wardenaar R, Neumann DA, Taudt A, Shaw RG, Jansen RC, Schmitz RJ,  
653 Colomé-Tatché M, Johannes F (2015). Rate, spectrum, and evolutionary dynamics  
654 of spontaneous epimutations. *PNAS* **112**, 6676-6681.  
655 <https://doi.org/10.1073/pnas.1424254112>
- 656 Gregg C, Zhang J, Weissbourd B, Luo S, Schroth GP, Haig D, Dulac C (2010).  
657 High-Resolution Analysis of Parent-of-Origin Allelic Expression in the Mouse  
658 Brain. *Science* **329**, 643-648. <https://doi.org/10.1126/science.1190830>
- 659 Guitton A-E, Page DR, Chambrier P, Lionnet C, Faure J-E, Grossniklaus U, Berger F  
660 (2004). Identification of new members of Fertilisation Independent Seed Polycomb  
661 Group pathway involved in the control of seed development in *Arabidopsis*  
662 *thaliana*. *Development* **131**, 2971-2981. <https://doi.org/10.1242/dev.01168>
- 663 Guo D, Jiang H, Yan W, Yang L, Ye J, Wang Y, Yan Q, Chen J, Gao Y, Duan L, Liu H,  
664 Xie L (2020). Resequencing 200 Flax Cultivated Accessions Identifies Candidate  
665 Genes Related to Seed Size and Weight and Reveals Signatures of Artificial  
666 Selection. *Frontiers in Plant Science* **10**, 1682.  
667 <https://doi.org/10.3389/fpls.2019.01682>
- 668 Hanna CW, Kelsey G (2017). Genomic imprinting beyond DNA methylation: a role  
669 for maternal histones. *Genome Biology* **18**, 177.  
670 <https://doi.org/10.1186/s13059-017-1317-9>
- 671 Hobson N, Deyholos MK (2013). Genomic and expression analysis of the flax (*Linum*  
672 *usitatissimum*) family of glycosyl hydrolase 35 genes. *BMC Genomics* **14**, 344.  
673 <https://doi.org/10.1186/1471-2164-14-344>
- 674 Hsieh T-F, Shin J, Uzawa R, Silva P, Cohen S, Bauer MJ, Hashimoto M, Kirkbride

- 675 RC, Harada JJ, Zilberman D, Fischer RL (2011). Regulation of imprinted gene  
676 expression in *Arabidopsis* endosperm. *PNAS* **108**, 1755-1762.  
677 <https://doi.org/10.1073/pnas.1019273108>
- 678 Huang F, Zhu Qh, Zhu A, Wu X, Xie L, Wu X, Helliwell C, Chaudhury A, Finnegan  
679 EJ, Luo M (2017). Mutants in the imprinted *PICKLE RELATED 2* gene suppress  
680 seed abortion of fertilization independent seed class mutants and paternal excess  
681 interploidy crosses in *Arabidopsis*. *The Plant Journal* **90**, 383–395
- 682 Huang X, Lu Z, Wang X, Ouyang Y, Chen W, Xie K, Wang D, Luo M, Luo J, Yao J  
683 (2016). Imprinted gene *OsFIE1* modulates rice seed development by influencing  
684 nutrient metabolism and modifying genome H3K27me3. *The Plant Journal* **87**,  
685 305–317.
- 686 Huis R, Hawkins S, Neutelings G (2010). Selection of reference genes for quantitative  
687 gene expression normalization in flax (*Linum usitatissimum* L.). *BMC Plant*  
688 *Biology* **10**, 71. <https://doi.org/10.1186/1471-2229-10-71>
- 689 Hutter B, Bieg M, Helms V, Paulsen M (2010). Divergence of imprinted genes during  
690 mammalian evolution. *BMC Evolutionary Biology* **10**, 116.  
691 <https://doi.org/10.1186/1471-2148-10-116>
- 692 Joanis V, Lloyd VK (2002). Genomic imprinting in *Drosophila* is maintained by the  
693 products of *Suppressor of variegation* and *trithorax* group, but not *Polycomb* group,  
694 genes. *Molecular Genetics and Genomics* **268**, 103-112.  
695 <https://doi.org/10.1007/s00438-002-0731-0>
- 696 Kinoshita T, Yadegari R, Harada JJ, Goldberg RB, Fischer RL (1999). Imprinting of  
697 the *MEDEA* polycomb gene in the *Arabidopsis* endosperm. *The Plant Cell* **11**,  
698 1945-1952. <https://doi.org/10.2307/3871089>
- 699 Kiyosue T, Ohad N, Yadegari R, Hannon M, Dinneny JR, Wells D, Katz A,  
700 Margossian L, Harada JJ, Goldberg RB, Fischer RL (1999). Control of  
701 fertilization-independent endosperm development by the *MEDEA* polycomb gene  
702 in *Arabidopsis*. *PNAS* **96**, 4186-4191. <https://doi.org/10.1073/pnas.96.7.4186>
- 703 Köhler C, Page DR, Gagliardini V, Grossniklaus U (2005). The *Arabidopsis thaliana*  
704 *MEDEA* Polycomb group protein controls expression of *PHERES1* by parental  
705 imprinting. *Nature Genetics* **37**, 28-30. <https://doi.org/10.1038/ng1495>
- 706 Kradolfer D, Wolff P, Jiang H, Siretskiy A, Köhler C (2013). An imprinted gene  
707 underlies postzygotic reproductive isolation in *Arabidopsis thaliana*.  
708 *Developmental Cell* **26**, 525–535. <https://doi.org/10.1016/j.devcel.2013.08.006>
- 709 Li Q, Song J, West PT, Zynda G, Eichten SR, Vaughn MW, Springer NM (2015).  
710 Examining the causes and consequences of context-specific differential DNA  
711 methylation in maize. *Plant Physiology* **168**, 1262-1274.  
712 <https://doi.org/10.1104/pp.15.00052>
- 713 Li Q, Wang J, Ye J, Zheng X, Xiang X, Li C, Fu M, Wang Q, Zhang Z, Wu Y (2017).  
714 The maize imprinted gene *Floury3* encodes a PLATZ protein required for tRNA  
715 and 5S rRNA transcription through interaction with RNA polymerase III. *The Plant*  
716 *Cell* **29**, 2661-2675. <https://doi.org/10.1105/tpc.17.00576>

- 717 Librado P, Rozas J (2009). DnaSP v5: a software for comprehensive analysis of DNA  
718 polymorphism data. *Bioinformatics* **25**, 1451-1452.  
719 <https://doi.org/10.1093/bioinformatics/btp187>
- 720 Lu J, Zhang C, Baulcombe DC, Chen ZJ (2012). Maternal siRNAs as regulators of  
721 parental genome imbalance and gene expression in endosperm of *Arabidopsis* seeds.  
722 *PNAS* **109**, 5529-5534. <https://doi.org/10.1073/pnas.1203094109>
- 723 Luo M, Bilodeau P, Dennis ES, Peacock WJ, Chaudhury A (2000). Expression and  
724 parent-of-origin effects for *FIS2*, *MEA*, and *FIE* in the endosperm and embryo of  
725 developing *Arabidopsis* seeds. *PNAS* **97**, 10637-10642.  
726 <https://doi.org/10.1073/pnas.170292997>
- 727 Luo M, Bilodeau P, Koltunow A, Dennis ES, Peacock WJ, Chaudhury AM (1999).  
728 Genes controlling fertilization-independent seed development in *Arabidopsis*  
729 *thaliana*. *PNAS* **96**, 296-301. <https://doi.org/10.1073/pnas.96.1.296>
- 730 Luo M, Taylor JM, Spriggs A, Zhang H, Wu X, Russell S, Singh M, Koltunow A  
731 (2011). A genome-wide survey of imprinted genes in rice seeds reveals imprinting  
732 primarily occurs in the endosperm. *PLoS Genetics* **7**, e1002125.  
733 <https://doi.org/10.1371/journal.pgen.1002125>
- 734 Mahajan M, Ahuja PS, Yadav SK (2011). Post-transcriptional silencing of flavonol  
735 synthase mRNA in tobacco leads to fruits with arrested seed set. *Plos One* **6**,  
736 e28315. <https://doi.org/10.1371/journal.pone.0028315>
- 737 Mei X, Liu C, Yu T, Liu X, Xu D, Wang J, Wang G, Cai Y (2015). Identification and  
738 characterization of paternal-preferentially expressed gene *NF-YC8* in maize  
739 endosperm. *Molecular Genetics and Genomics* **290**, 1819-1831.  
740 <https://doi.org/10.1007/s00438-015-1043-5>
- 741 Meng D, Zhao J, Zhao C, Luo H, Jin W (2018). Sequential gene activation and gene  
742 imprinting during early embryo development in maize. *The Plant Journal* **93**,  
743 445-459.
- 744 Miyake T, Takebayashi N, Wolf DE (2009). Possible diversifying selection in the  
745 imprinted gene, *MEDEA*, in *Arabidopsis*. *Molecular Biology and Evolution* **26**,  
746 843-857. <https://doi.org/10.1093/molbev/msp001>
- 747 Moreno-Romero J, León GDT-D, Yadav VK, Santos-González J, Köhler C (2019).  
748 Epigenetic signatures associated with imprinted paternally expressed genes in the  
749 *Arabidopsis* endosperm. *Genome Biology* **20**, 41.  
750 <https://doi.org/10.1186/s13059-019-1652-0>
- 751 Ohad N, Margossian L, Hsu Y-C, Williams C, Repetti P, Fischer RL (1996). A  
752 mutation that allows endosperm development without fertilization. *PNAS* **93**,  
753 5319-5324. <https://doi.org/10.1073/pnas.93.11.5319>
- 754 Ohad N, Yadegari R, Margossian L, Hannon M, Michaeli D, Harada JJ, Goldberg RB,  
755 Fischer RL (1999). Mutations in *FIE*, a WD polycomb group gene, allow  
756 endosperm development without fertilization. *The Plant Cell* **11**, 407-415.  
757 <https://doi.org/10.1105/tpc.11.3.407>
- 758 Pignatta D, Erdmann RM, Scheer E, Picard CL, Bell GW, Gehring M (2014). Natural

- 759 epigenetic polymorphisms lead to intraspecific variation in *Arabidopsis* gene  
760 imprinting. *eLife* **3**, e03198. <https://doi.org/10.7554/eLife.03198>
- 761 Piskurewicz U, Iwasaki M, Susaki D, Megies C, Kinoshita T, Lopez-Molina L (2016).  
762 Dormancy-specific imprinting underlies maternal inheritance of seed dormancy in  
763 *Arabidopsis thaliana*. *eLife* **5**, e19573. <https://doi.org/10.7554/elife.19573>
- 764 Renfree MB, Suzuki S, Kaneko-Ishino T (2012). The origin and evolution of genomic  
765 imprinting and viviparity in mammals. *Philosophical Transactions of the Royal  
766 Society B Biological Sciences* **368**, 20120151.  
767 <https://doi.org/10.1098/rstb.2012.0151>
- 768 Rodrigues JA, Zilberman D (2015). Evolution and function of genomic imprinting in  
769 plants. *Genes and Development* **29**, 2517–2531.  
770 <https://doi.org/10.1101/gad.269902.115>
- 771 Sabelli PA, Larkins BA (2009). The development of endosperm in grasses. *Plant  
772 Physiology* **149**, 14–26. <https://doi.org/10.1104/pp.108.129437>
- 773 Schmitz RJ, Schultz MD, Lewsey MG, O'Malley RC, Urich MA, Libiger O, Schork  
774 NJ, Ecker JR (2011). Transgenerational epigenetic instability is a source of novel  
775 methylation variants. *Science* **334**, 369–373.  
776 <https://doi.org/10.1126/science.1212959>
- 777 Schmitz RJ, Schultz MD, Urich MA, Nery JR, Pelizzola M, Libiger O, Alix A,  
778 McCosh RB, Chen H, Schork NJ, Ecker JR (2013). Patterns of population  
779 epigenomic diversity. *Nature* **495**, 193–198. <https://doi.org/10.1038/nature11968>
- 780 Scott RJ, Spielman M, Bailey J, Dickinson HG (1998). Parent-of-origin effects on  
781 seed development in *Arabidopsis thaliana*. *Development* **125**, 3329–3341.
- 782 Sekine D, Ohnishi T, Furuumi H, Ono A, Yamada T, Kurata N, Kinoshita T (2013).  
783 Dissection of two major components of the post-zygotic hybridization barrier in  
784 rice endosperm. *The Plant Journal* **76**, 792–799. <https://doi.org/10.1111/tpj.12333>
- 785 Sha K (2008). A mechanistic view of genomic imprinting. *Annu Rev Genomics Hum  
786 Genet* **9**, 197–216. <https://doi.org/10.1146/annurev.genom.122007.110031>
- 787 Spillane C, Schmid KJ, Laoueillé-Duprat S, Pien S, Escobar-Restrepo J-M, Baroux C,  
788 Gagliardini V, Page DR, Wolfe KH, Grossniklaus U (2007). Positive darwinian  
789 selection at the imprinted *MEDEA* locus in plants. *Nature* **448**, 349–352.  
790 <https://doi.org/10.1038/nature05984>
- 791 Sreenivasulu N, Wobus U (2013). Seed-development programs: A systems  
792 biology-based comparison between dicots and monocots. *Annual Review of Plant  
793 Biology* **64**, 189–217. <https://doi.org/10.1146/annurev-arplant-050312-120215>
- 794 Sun C, Tang T, Tang W, Sui L, Zhang H, Xia Z, Zhao H, Han Y, Lin L (2017). Plant  
795 genomic imprinting and its effect on seed development. *Agricultural Science and  
796 Technology* **18**, 984–987. <https://doi.org/10.16175/j.cnki.1009-4229.2017.06.006>
- 797 Sun R-h 2018. Characterization and Functional Analysis of MADS-box from coconut  
798 (*Cocos nucifera* L.) endosperm. [Hainan University.
- 799 Trapnell C, Williams BA, Pertea G, Mortazavi A, Kwan G, Baren MJv, Salzberg SL,  
800 Wold BJ, Pachter L (2010). Transcript assembly and quantification by RNA-Seq

- 801 reveals unannotated transcripts and isoform switching during cell differentiation.  
802 *Nature Biotechnology* **28**, 511-515. <https://doi.org/10.1038/nbt.1621>
- 803 Tuteja R, McKeown PC, Ryan P, Morgan CC, Donoghue MTA, Downing T,  
804 O'Connell MJ, Spillane C (2019). Paternally expressed imprinted genes under  
805 positive Darwinian selection in *Arabidopsis thaliana*. *Molecular Biology and*  
806 *Evolution* **36**, 1239–1253. <https://doi.org/10.1093/molbev/msz063>
- 807 Voorrips RE (2002). MapChart: software for the Graphical Presentation of Linkage  
808 Maps and QTLs. *Journal of Heredity* **93**, 77-78.  
809 <https://doi.org/10.1093/jhered/93.1.77>
- 810 Wang A, Hou Q, Si L, Huang X, Luo J, Lu D, Zhu J, Shangguan Y, Miao J, Xie Y,  
811 Wang Y, Zhao Q, Feng Q, Zhou C, Li Y, Fan D, Lu Y, Tian Q, Wang Z, Han B  
812 (2019). The PLATZ transcription factor GL6 affects grain length and number in  
813 rice. *Plant Physiology* **180**, 2077-2090. <https://doi.org/10.1104/pp.18.01574>
- 814 Wang L, Yuan J, Ma Y, Jiao W, Ye W, Yang D, Yi C, Chen ZJ (2018). Rice interploidy  
815 crosses disrupt epigenetic regulation, gene expression, and seed development.  
816 *Molecular Plant* **11**, 300-314. <https://doi.org/10.1016/j.molp.2017.12.006>
- 817 Wang Z, Hobson N, Galindo L, Zhu S, Shi D, McDill J, Yang L, Hawkins S,  
818 Neutelings G, Datla R, Lambert G, Galbraith DW, Grassa CJ, Geraldine A, Cronk  
819 QC, Cullis C, Dash PK, Kumar PA, Cloutier S, Sharpe AG, Wong GK-S, Wang J,  
820 Deyholos MK (2012). The genome of flax (*Linum usitatissimum*) assembled *de*  
821 *novo* from short shotgun sequence reads. *The Plant Journal* **72**, 461–473.  
822 <https://doi.org/10.1111/j.1365-313X.2012.05093.x>
- 823 Waters AJ, Bilinski P, Eichten SR, Vaughn MW, Ross-Ibarra J, Gehring M, Springer  
824 NM (2013). Comprehensive analysis of imprinted genes in maize reveals allelic  
825 variation for imprinting and limited conservation with other species. *PNAS* **110**,  
826 19639–19644. <https://doi.org/10.1073/pnas.1309182110>
- 827 Waters AJ, Makarevitch I, Eichten SR, Swanson-Wagner RA, Yeh C-T, Xu W,  
828 Schnable PS, Vaughn MW, Gehring M, Springer NM (2011). Parent-of-origin  
829 effects on gene expression and DNA methylation in the maize endosperm. *The*  
830 *Plant Cell* **23**, 4221-4233. <https://doi.org/10.1105/tpc.111.092668>
- 831 Wolff P, Jiang H, Wang G, Santos-González J, Köhler C (2015). Paternally expressed  
832 imprinted genes establish postzygotic hybridization barriers in *Arabidopsis thaliana*.  
833 *eLife* **4**, e10074. <https://doi.org/10.7554/eLife.10074>
- 834 Wolff P, Weinhofer I, Seguin J, Roszak P, Beisel C, Donoghue MTA, Spillane C,  
835 Nordborg M, Rehmsmeier M, Köhler C (2011). High-resolution analysis of  
836 parent-of-origin allelic expression in the *Arabidopsis* endosperm. *PLoS Genetics* **7**,  
837 e1002126. <https://doi.org/10.1371/journal.pgen.1002126>
- 838 Xu J, Chen G, Hermanson PJ, Xu Q, Sun C, Chen W, Kan Q, Li M, Crisp PA, Yan J,  
839 Li L, Springer NM, Li Q (2019). Population-level analysis reveals the widespread  
840 occurrence and phenotypic consequence of DNA methylation variation not tagged  
841 by genetic variation in maize. *Genome Biology* **20**, 243.  
842 <https://doi.org/10.1186/s13059-019-1859-0>

- 843 Xu W, Dai M, Li F, Liu A (2014). Genomic imprinting, methylation and  
844 parent-of-origin effects in reciprocal hybrid endosperm of castor bean. *Nucleic*  
845 *Acids Research* **42**, 6987-6998. <https://doi.org/10.1093/nar/gku375>
- 846 Yang X, Wu F, Lin X, Du X, Chong K, Gramzow L, Schilling S, Becker A, Theißen G,  
847 Meng Z (2012). Live and let die - the B<sub>sister</sub> MADS-box gene *OsMADS29* controls  
848 the degeneration of cells in maternal tissues during seed development of rice  
849 (*Oryza sativa*). *Plos One* **7**, e51435. <https://doi.org/10.1371/journal.pone.0051435>
- 850 Ye J, Fang L, Zheng H, Zhang Y, Chen J, Zhang Z, Wang J, Li S, Li R, Bolund L,  
851 Wang J (2006). WEGO : a web tool for plotting GO annotations. *Nucleic Acids*  
852 *Research* **34**, W293-W297. <https://doi.org/10.1093/nar/gkl031>
- 853 Yuan J, Chen S, Jiao W, Wang L, Wang L, Ye W, Lu J, Hong D, You S, Cheng Z, Yang  
854 D, Chen ZJ (2017). Both maternally and paternally imprinted genes regulate seed  
855 development in rice. *New Phytologist* **216**, 373–387.
- 856 Zhang J, Qi Y, Wang L, Wang L, Yan X, Dang Z, Li W, Zhao W, Pei X, Li X, Liu M,  
857 Tan M, Wang L, Long Y, Wang J, Zhang X, Dang Z, Zheng H, Liu T (2020).  
858 Genomic comparison and population diversity analysis provide insights into the  
859 domestication and improvement of flax. *iScience* **23**, 100967.  
860 <https://doi.org/10.1016/j.isci.2020.100967>
- 861 Zhang M, Li N, He W, Zhang H, Yang W, Liu B (2016a). Genome-wide screen of  
862 genes imprinted in sorghum endosperm, and the roles of allelic differential cytosine  
863 methylation. *The Plant Journal* **85**, 424-436.
- 864 Zhang M, Zhao H, Xie S, Chen J, Xu Y, Wang K, Zhao H, Guan H, Hu X, Jiao Y,  
865 Song W, Lai J (2011). Extensive, clustered parental imprinting of protein-coding  
866 and noncoding RNAs in developing maize endosperm. *PNAS* **108**, 20042–20047.  
867 <https://doi.org/10.1073/pnas.1112186108>
- 868 Zhang S, Feng D, Tian X, Yang X (2003). Progress on imprinted genes in mammals.  
869 *Progress in Biotechnology* **23**, 48-54.  
870 <https://doi.org/10.3969/j.issn.1671-8135.2003.12.011>
- 871 Zhang W, Cao S, Jiang L, Zhu S, Wan J (2005). Genomic imprinting and seed  
872 development. *Hereditas* **27**, 665-670.  
873 <https://doi.org/10.3321/j.issn:0253-9772.2005.04.029>
- 874 Zhang X-J, Jiang W-B, Pang Y-Z (2016b). Advances in the regulation mechanism of  
875 plant seed size. *Plant Physiology Journal* **52**, 998-1010.  
876 <https://doi.org/10.13592/j.cnki.ppj.2016.0159>
- 877 Zhou S-R, Xue H-W (2020). The rice PLATZ protein SHORT GRAIN6 determines  
878 grain size by regulating spikelet hull cell division. *Journal of Integrative Plant*  
879 *Biology* **62**, 847-864. <https://doi.org/10.1111/jipb.12851>

## 880 **Figure legends**

881 **Figure 1. Identification of imprinted genes in flax endosperm.** (A) The proportion  
882 of parental transcripts in both CZ and ZC was plotted for 52,794 SNPs with at least  
883 ten reads could be assigned to a specific allele. The shaded areas indicated moderate

884 (pink), strong (blue), or complete (arrows) maternally expressed imprinted SNP loci  
885 (upper right) or paternally expressed imprinted SNP loci (lower left). (B) The number  
886 of moderate (pink), strong (blue), and complete (gray) imprinted SNP loci and  
887 imprinted genes in endosperm. ME-SNPs, maternally expressed imprinted SNP loci;  
888 PE-SNPs, paternally expressed imprinted SNP loci; MEG, maternally expressed  
889 imprinted genes; PEG, paternally expressed imprinted gene.

890 **Figure 2. The conservation of flax imprinted genes between other species.** (A)  
891 Venn diagram showing overlaps of imprinted genes at E-value<1E-10 between flax  
892 and maize, rice, *Arabidopsis*, castor bean, sorghum, respectively. (B) Venn diagram  
893 showing overlaps of imprinted genes at E-value<1E-20. (C) Venn diagram showing  
894 overlaps of imprinted genes at E-value<1E-50.

895 **Figure 3. Some flax imprinted genes are located in mini-clusters.** The MEGs (red)  
896 and PEGs (blue) were mapped to the 15 flax chromosomes. Genes clustered within 10  
897 kb are boxed in green.

898 **Figure 4. Expression of flax imprinted genes over various flax tissues in both**  
899 **reciprocal hybrids based on RNA-seq analysis.** (A, B) The gene-expression  
900 patterns for MEGs (A) and PEGs (B). endo-MEGs, MEGs that expressed  
901 preferentially in endosperm; con-MEGs, MEGs that also expressed in other tissues;  
902 endo-PEGs, PEGs that expressed preferentially in endosperm; con-PEGs, PEGs that  
903 also expressed in other tissues. The normalized values were used for hierarchical  
904 clustering and the heat map indicated relative levels of expression. The endosperm  
905 and embryo tissues were harvested at 7 DAP and the leaf tissues were collected at 2  
906 weeks after planting. For each sample, three biological replicates were used. (C, D)  
907 The Log<sub>10</sub>(FPKM) values of CZ (C) and ZC (D). The Log<sub>10</sub>(FPKM) values of CZ (C)  
908 and ZC (D). All genes with FPKM>1 in endosperm were used in this study. The  
909 values listed above box plots were the number of genes in each group. Asterisks  
910 indicate the significance level (\*,  $P < 0.05$ ; \*\*,  $P < 0.01$ ; \*\*\*,  $P < 0.001$ ).

911 **Figure 5. Imprinted genes differentiate flax subgroups.** (A) The correlation of  
912 kinships between imprinted SNPs or all SNPs. (B) Phylogenetic tree of 200 flax  
913 accessions inferred from imprinted SNPs. (C) PCA plots of all imprinted SNPs,  
914 ME-SNPs and PE-SNPs. Fiber flax, oil-fiber dual purpose flax (OF), and Oil flax  
915 were represented in red, blue and green colors, respectively.

916 **Figure 6. Distribution of nucleotide diversity ( $\pi$ ) within imprinted genes and**  
917 **allele frequency differences of two genes across oil and fiber subgroups.** (A-C)  
918 Boxplots for nucleotide diversity of all imprinted genes (A), MEGs (B) and PEGs (C)  
919 across Oil (green) and Fiber (red) groups. (D, G) The distribution of allele frequency  
920 of SNPs located in *Lus10010350* (D, PEG) and *Lus10024230* (G, MEG) in Oil and  
921 Fiber subgroups. The alternate alleles and reference alleles were shown in purple and  
922 orange, respectively. (E, H) The nucleotide diversity distribution of *Lus10010350* on  
923 chromosome 15 (E) and *Lus10024230* on chromosome 12 (H) among Oil and Fiber

924 subgroups. (F, I) Boxplots for nucleotide diversity of *Lus10010350* (F) and  
925 *Lus10024230* (I) among Oil and Fiber subgroups. The difference was analyzed by  
926 two-tailed *t* tests.

927 **Figure 7. Imprinted gene-based association study for seed size and weight, and**  
928 **identification of a causal gene for the peak on chromosome 15.** (A-B) The  
929 overlapping Manhattan plots for seed length, seed width and 1,000-seed weight in  
930 four environments (including 2016DL, 2017UR, 2019UR, 2019YL) using GLM (A)  
931 and MLM (B) models. Imprinted genes repeatedly detected at least two environments  
932 or traits related to seed size and weight were marked by red arrows. (C) Local  
933 Manhattan plots for seed width in 2016DL of imprinted gene-based association  
934 analysis surrounding the peak on chromosome 15. The position of *Lus10010350* was  
935 highlighted by a shaded pink column. (D) Gene structure of *Lus10010350*. (E) DNA  
936 polymorphism in *Lus10010350*. (F) Schematic representation of the structural  
937 variation in *Lus10010350*. (G-J) Boxplots for 1,000-seed weight based on the  
938 haplotypes (Hap.) for *Lus10010350* in 2016DL (G), 2017UR (H), 2019UR (I) and  
939 2019YL (J). In the box plots, the center line represented the median, box limits  
940 indicated the upper and lower quartiles, whiskers marked the range of the data and  
941 points showed outliers. *n* indicated the number of accessions with the same genotype.  
942 The difference between haplotypes was analyzed by two-tailed *t* tests.

#### 943 **Supplementary information**

944 **Figure S1.** Flow chart for identification of imprinted genes in flax endosperm.

945 **Figure S2.** Verification of thirteen genes in flax endosperm based on qRT-PCR  
946 analysis. Thirteen genes were chosen for the qRT-PCR analyses. Among these genes,  
947 five were MEGs, five were PEGs, and others were not imprinted genes. So, the gene  
948 expression level between qRT-PCR and RNA sequencing of these thirteen genes  
949 represented the whole types of genes in this study.

950 **Figure S3.** Validation of the imprinted genes in flax endosperm by PCR sequencing.  
951 Twelve imprinted genes including nine MEGs and three PEGs were selected for  
952 validation. Each gene was designed by a pair of primers with a 400-800bp  
953 amplification fragment which was a part of the corresponding CDS sequence of CC  
954 (endosperm of Cili2719 self-cross), ZZ (endosperm of Z11637 self-cross), CZ  
955 (endosperm of Cili2719×Z11637), and ZC (endosperm of Z11637×Cili2719) and the  
956 amplification fragment contained at least one imprinted SNP site.

957 **Figure S4.** Gene ontology analysis of 229 identified imprinted genes and 115  
958 conserved imprinted genes. (A) Gene ontology analysis of identified imprinted genes.  
959 MEGs represented 135 maternally expressed genes (red), PEGs represented 94  
960 paternally expressed genes (purple), All imprinted genes represented 229 moderate  
961 imprinted genes (blue), All genes represented all endosperm-expressed genes with at  
962 least ten reads could be assigned to a specific allele in both CZ and ZC (yellow). (B)



963 Gene ontology analysis of conserved imprinted genes. Conserved MEGs represented  
964 75 conserved maternally expressed genes (red), Conserved PEGs represented 40  
965 conserved paternally expressed genes (purple), Conserved imprinted genes  
966 represented 115 conserved imprinted genes (blue), All genes were presented as A.

967 **Figure S5.** Expression of conserved imprinted genes in different tissues of flax in  
968 both reciprocal hybrids CZ and ZC based on RNA-seq analysis. (A, B) The  
969 gene-expression patterns for MEGs (A) and PEGs (B) of 115 conserved imprinted  
970 genes. (C) The gene-expression patterns for MEGs and PEGs of 38 conserved strong  
971 imprinted genes. endo-MEGs, MEGs that expressed preferentially in endosperm;  
972 con-MEGs, MEGs that expressed in many tissues; endo-PEGs, PEGs that expressed  
973 preferentially in endosperm; con-PEGs, PEGs that expressed in many tissues. The  
974 normalized values were used for hierarchical clustering and the heat map indicates  
975 relative levels of expression. The endosperm and embryo tissues were harvested at 7  
976 DAP and the leaf tissues were collected at 2 weeks after planting. For each sample,  
977 three biological replicates were used.

978 **Figure S6.** MEGs and PEGs can differentiate flax subgroups. (A) Phylogenetic tree of  
979 200 flax accessions inferred from ME-SNPs. (B) Phylogenetic tree of 200 flax  
980 accessions inferred from PE-SNPs. ME-SNPs, maternally expressed imprinted SNP  
981 loci; PE-SNPs, paternally expressed imprinted SNP loci. Fiber flax, oil-fiber dual  
982 purpose flax (OF), and Oil flax were represented in red, blue and green colors,  
983 respectively.

984 **Figure S7.** Boxplots for seed length and seed width based on the haplotypes (Hap.)  
985 for *Lus10010350*. (A-B) The seed length (A) and seed width (B) in 2016DL. (C-D)  
986 The seed length (C) and seed width (D) in 2017UR. (E-F) The seed length (E) and  
987 seed width (F) in 2019UR. (G-H) The seed length (G) and seed width (H) in 2019YL.  
988 In the box plots, the center line represented the median, box limits indicated the upper  
989 and lower quartiles, whiskers marked the range of the data and points showed outliers.  
990 *n* indicates the number of accessions with the same genotype. The difference between  
991 haplotypes was analyzed by two-tailed *t* tests.

992 **Figure S8.** The nucleotide diversity distribution of *Lus10041386*. (A) The nucleotide  
993 diversity distribution of *Lus10041386* on chromosome 15 among Oil and Fiber  
994 subgroups. (B) Boxplots for nucleotide diversity of *Lus10041386* among Oil and  
995 Fiber subgroups. The difference was analyzed by two-tailed *t* tests.

996 **Table S1.** Imprinted genes in both hybrid endosperms and associated SNPs.

997 **Table S2.** Functional annotations of 229 imprinted protein-coding genes.

998 **Table S3.** Gene ontology enrichment analysis of 229 flax imprinted genes.

999 **Table S4.** The conservation of imprinted genes detected in our endosperm samples.

1000 **Table S5.** The number of conserved flax imprinted genes with other species.

1001 **Table S6.** Gene ontology enrichment analysis of 115 conserved imprinted genes in  
1002 flax.

1003 **Table S7.** Clusters of imprinted genes.

1004 **Table S8.** Imprinted genes related to seed size and 1000-seed weight based on  
1005 candidate gene-based association study.

1006 **Table S9.** Primers for qRT-PCR.

1007 **Table S10.** Primers for imprinting validation by PCR-sequencing.

1008

1009

1010

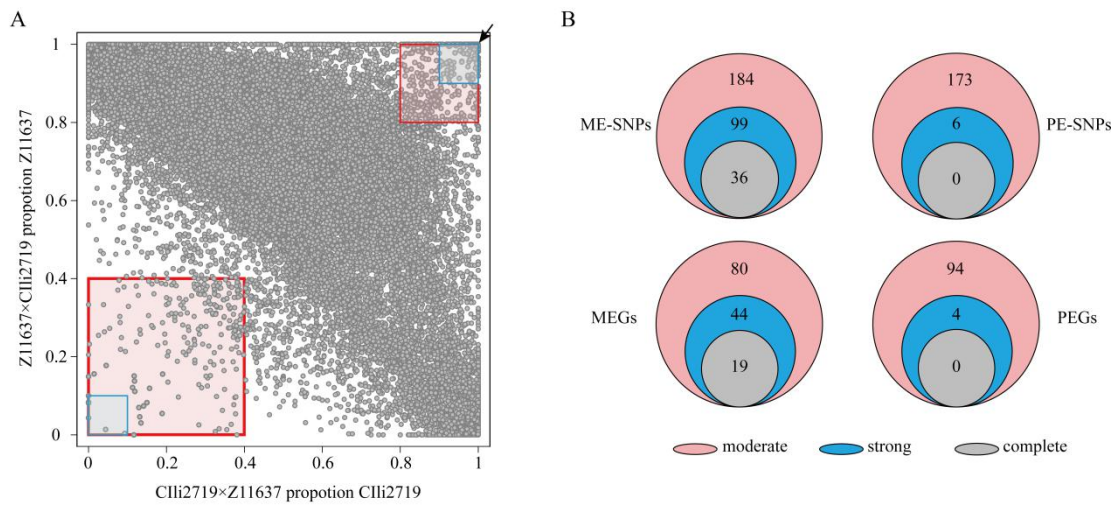

1011

1012 **Figure 1.** Identification of imprinted genes in flax endosperm. (A) The proportion of parental  
1013 transcripts in both CZ and ZC was plotted for 52,794 SNPs with at least ten reads could be assigned to  
1014 a specific allele. The shaded areas indicated moderate (pink), strong (blue), or complete (arrows)  
1015 maternally expressed imprinted SNP loci (upper right) or paternally expressed imprinted SNP loci  
1016 (lower left). (B) The number of moderate (pink), strong (blue), and complete (gray) imprinted SNP loci  
1017 and imprinted genes in endosperm. ME-SNPs, maternally expressed imprinted SNP loci; PE-SNPs,  
1018 paternally expressed imprinted SNP loci; MEG, maternally expressed imprinted genes; PEG, paternally  
1019 expressed imprinted gene.

1020

1021

1022

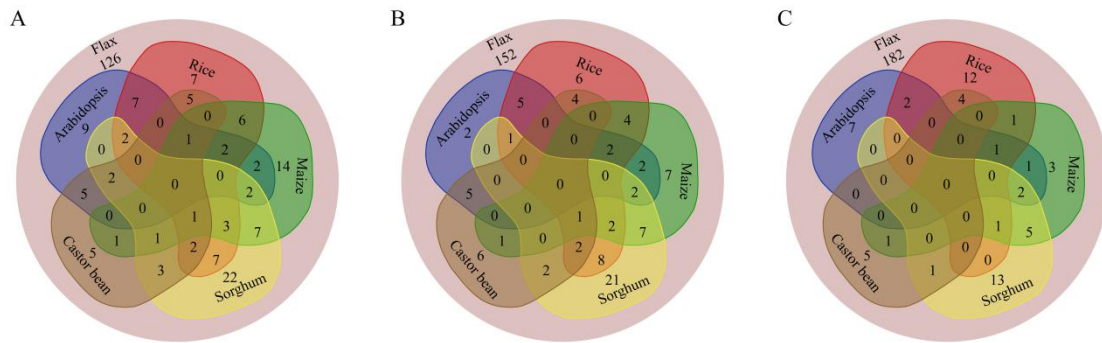

1023

1024 **Figure 2.** The conservation of flax imprinted genes between other species. (A) Venn diagram showing  
1025 overlaps of imprinted genes at E-value<1E-10 between flax and maize, rice, *Arabidopsis*, castor bean,  
1026 sorghum, respectively. (B) Venn diagram showing overlaps of imprinted genes at E-value<1E-20. (C)  
1027 Venn diagram showing overlaps of imprinted genes at E-value<1E-50.

1028

1029

1030

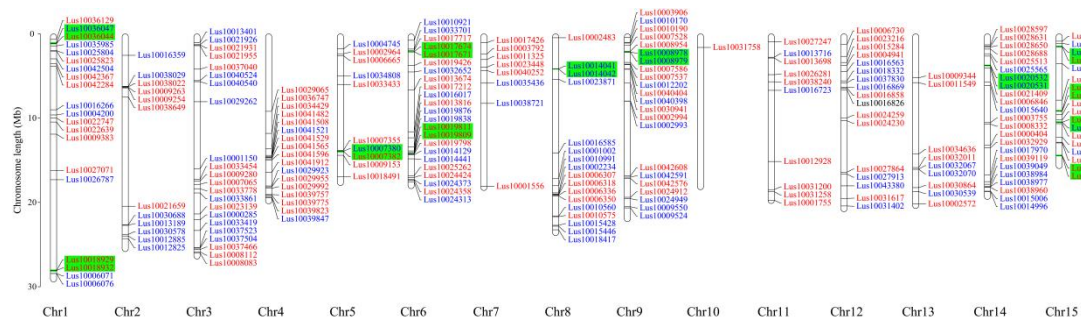

1031

1032

1033

1034

**Figure 3.** Some flax imprinted genes are located in mini-clusters. The MEGs (red) and PEGs (blue) were mapped to the 15 flax chromosomes. Genes clustered within 10 kb are boxed in green.

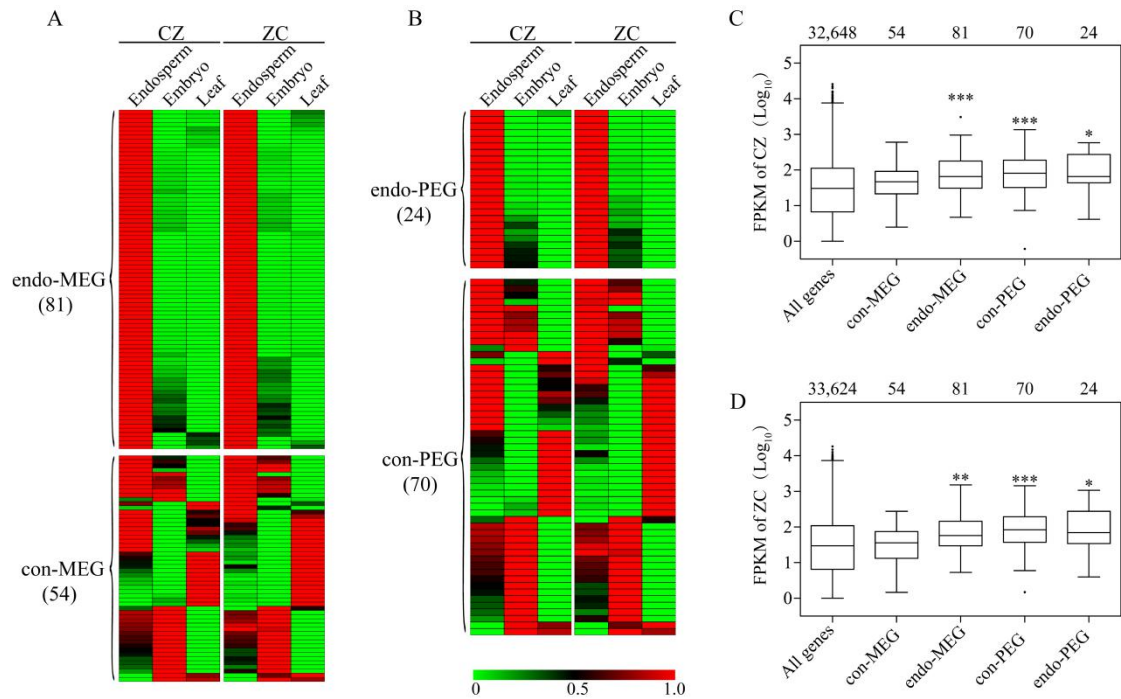

1035

1036 **Figure 4.** Expression of flax imprinted genes over various flax tissues in both reciprocal hybrids based  
 1037 on RNA-seq analysis. (A, B) The gene-expression patterns for MEGs (A) and PEGs (B). endo-MEGs,  
 1038 MEGs that expressed preferentially in endosperm; con-MEGs, MEGs that also expressed in other  
 1039 tissues; endo-PEGs, PEGs that expressed preferentially in endosperm; con-PEGs, PEGs that also  
 1040 expressed in other tissues. The normalized values were used for hierarchical clustering and the heat  
 1041 map indicated relative levels of expression. The endosperm and embryo tissues were harvested at 7  
 1042 DAP and the leaf tissues were collected at 2 weeks after planting. For each sample, three biological  
 1043 replicates were used. (C, D) The Log<sub>10</sub>(FPKM) values of CZ (C) and ZC (D). The Log<sub>10</sub>(FPKM)  
 1044 values of CZ (C) and ZC (D). All genes with FPKM>1 in endosperm were used in this study. The  
 1045 values listed above box plots were the number of genes in each group. Asterisks indicate the  
 1046 significance level (\*,  $P < 0.05$ ; \*\*,  $P < 0.01$ ; \*\*\*,  $P < 0.001$ ).

1047

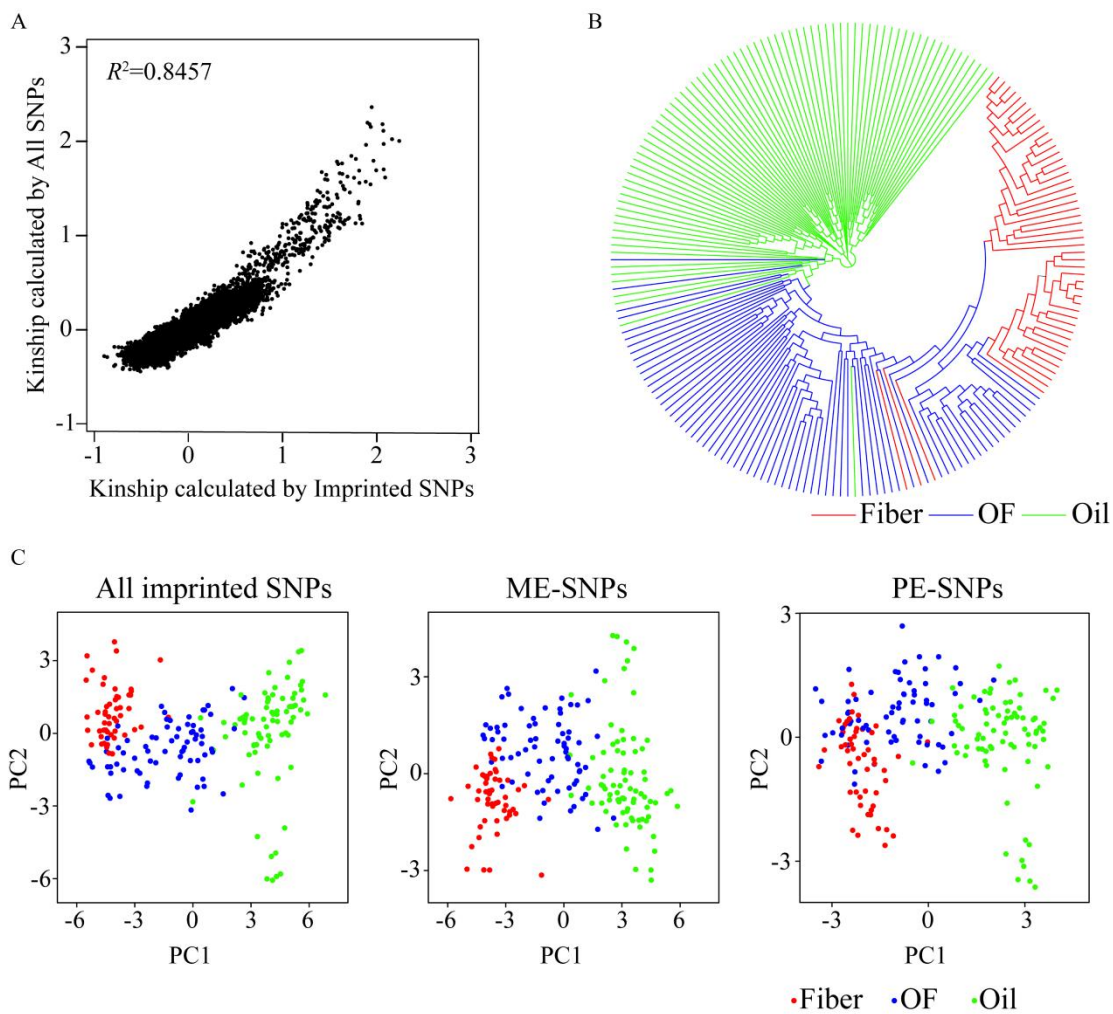

1048

1049 **Figure 5.** Imprinted genes differentiate flax subgroups. (A) The correlation of kinships between  
1050 imprinted SNPs or all SNPs. (B) Phylogenetic tree of 200 flax accessions inferred from imprinted  
1051 SNPs. (C) PCA plots of all imprinted SNPs, ME-SNPs and PE-SNPs. Fiber flax, oil-fiber dual purpose  
1052 flax (OF), and Oil flax were represented in red, blue and green colors, respectively.

1053

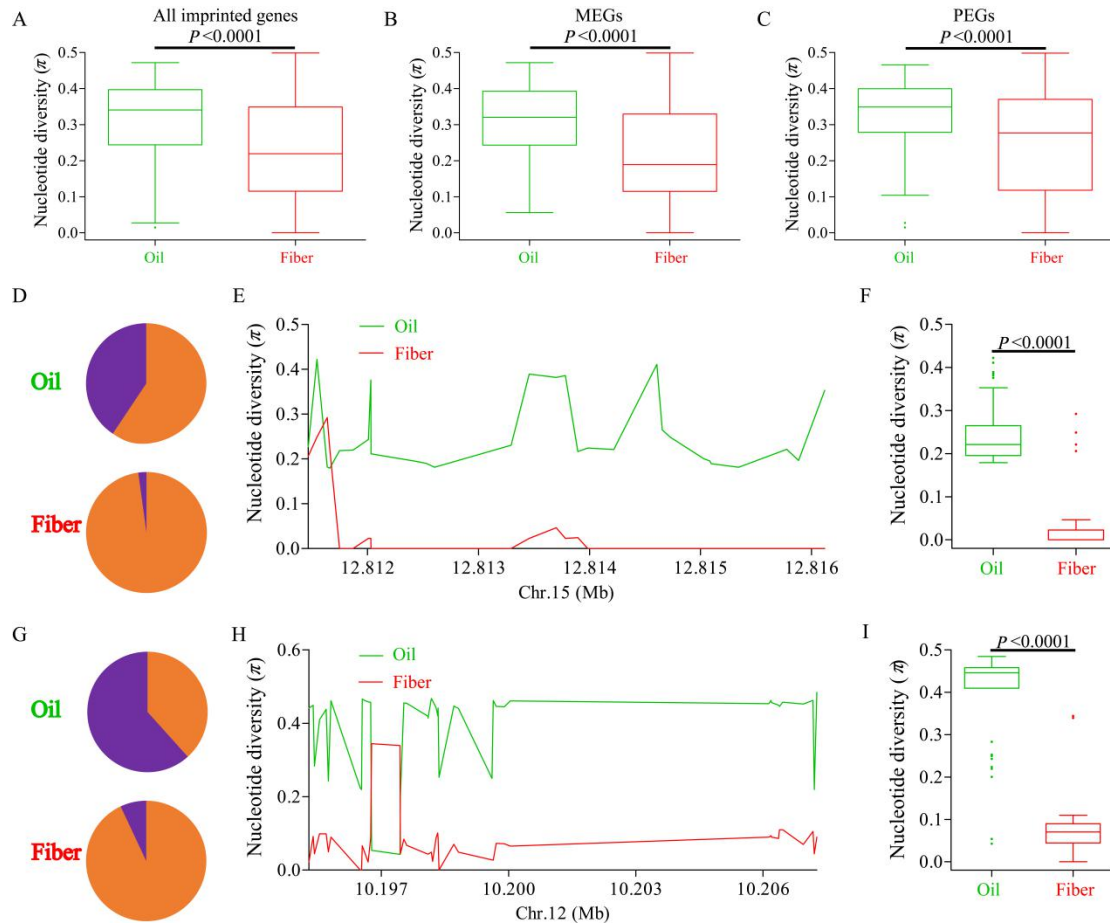

1054

1055 **Figure 6.** Distribution of nucleotide diversity ( $\pi$ ) within imprinted genes and allele frequency  
 1056 differences of two genes across oil and fiber subgroups. (A-C) Boxplots for nucleotide diversity of all  
 1057 imprinted genes (A), MEGs (B) and PEGs (C) across Oil (green) and Fiber (red) groups. (D, G) The  
 1058 distribution of allele frequency of SNPs located in *Lus10010350* (D, PEG) and *Lus10024230* (G, MEG)  
 1059 in Oil and Fiber subgroups. The alternate alleles and reference alleles were shown in purple and orange,  
 1060 respectively. (E, H) The nucleotide diversity distribution of *Lus10010350* on chromosome 15 (E) and  
 1061 *Lus10024230* on chromosome 12 (H) among Oil and Fiber subgroups. (F, I) Boxplots for nucleotide  
 1062 diversity of *Lus10010350* (F) and *Lus10024230* (I) among Oil and Fiber subgroups. The difference was  
 1063 analyzed by two-tailed *t* tests.

1064



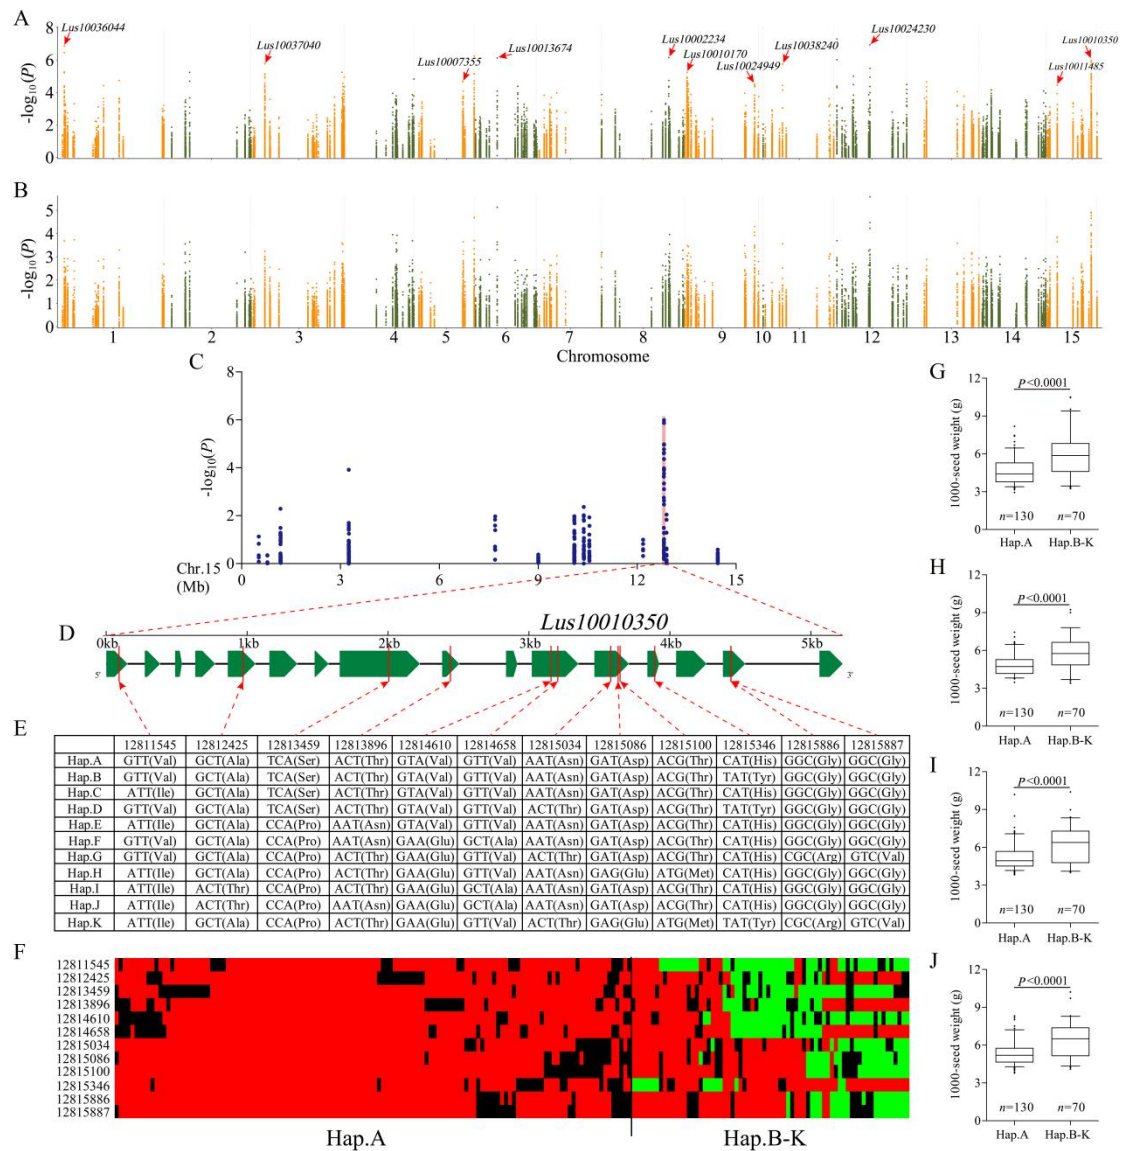

1065

1066 **Figure 7.** Imprinted gene-based association study for seed size and weight, and identification of a  
 1067 causal gene for the peak on chromosome 15. (A-B) The overlapping Manhattan plots for seed length,  
 1068 seed width and 1,000-seed weight in four environments (including 2016DL, 2017UR, 2019UR,  
 1069 2019YL) using GLM (A) and MLM (B) models. Imprinted genes repeatedly detected at least two  
 1070 environments or traits related to seed size and weight were marked by red arrows. (C) Local Manhattan  
 1071 plots for seed width in 2016DL of imprinted gene-based association analysis surrounding the peak on  
 1072 chromosome 15. The position of *Lus10010350* was highlighted by a shaded pink column. (D) Gene  
 1073 structure of *Lus10010350*. (E) DNA polymorphism in *Lus10010350*. (F) Schematic representation of  
 1074 the structural variation in *Lus10010350*. (G-J) Boxplots for 1,000-seed weight based on the haplotypes  
 1075 (Hap.) for *Lus10010350* in 2016DL (G), 2017UR (H), 2019UR (I) and 2019YL (J). DL, Dali; UR,  
 1076 Urumqi; YL, YiLi. In the box plots, the center line represented the median, box limits indicated the  
 1077 upper and lower quartiles, whiskers marked the range of the data and points showed outliers. *n*  
 1078 indicated the number of accessions with the same genotype. The difference between haplotypes was  
 1079 analyzed by two-tailed *t* tests.
